1 **The AP-1 complex is essential for fungal growth via its role**  
2 **in secretory vesicle polar sorting, endosomal recycling and**  
3 **cytoskeleton organization**

4

5

6 **Olga Martzoukou, George Diallinas\* and Sotiris Amillis\***

7

8 Department of Biology, National and Kapodistrian University of Athens, 15784  
9 Panepistimioupolis, Athens, Greece

10 \*Corresponding authors: [samillis@biol.uoa.gr](mailto:samillis@biol.uoa.gr), [diallina@biol.uoa.gr](mailto:diallina@biol.uoa.gr)

11

12 **Key words:**

13 fungi/traffic/secretion/Rab GTPases/transport/microtubules

14

15

16

17

18

19

20

21

22

23

24 **Abstract**

25 The AP-1 complex is essential for membrane protein traffic via its role in the  
26 pinching-off and sorting of secretory vesicles from the trans-Golgi and/or endosomes.  
27 While its essentiality is undisputed in metazoa, its role in model simpler eukaryotes  
28 seems less clear. Here we dissect the role of AP-1 in the filamentous fungus  
29 *Aspergillus nidulans* and show that it is absolutely essential for growth due to its role  
30 in clathrin-dependent maintenance of polar traffic of specific membrane cargoes  
31 towards the apex of growing hyphae. We provide evidence that AP-1 is involved in  
32 both anterograde sorting of RabE<sup>Rab11</sup>-labeled secretory vesicles and RabA/B<sup>Rab5</sup>-  
33 dependent endosome recycling. Additionally, AP-1 is shown to be critical for  
34 microtubule and septin organization, further rationalizing its essentiality in cells that  
35 face the challenge of cytoskeleton-dependent polarized cargo traffic. This work also  
36 opens a novel issue on how non-polar cargoes, such as transporters, are sorted to the  
37 eukaryotic plasma membrane.

38

39

40

41

## 42 **Introduction**

43 All eukaryotic cells face the challenge of topological sorting of their biomolecules in  
44 their proper subcellular destinations. In particular, newly synthesized membrane  
45 proteins, which are translationally translocated into the membrane of the ER, follow  
46 complex, dynamic, and often overlapping, trafficking routes, embedded in the lipid  
47 bilayer of ‘secretory’ vesicles, to be sorted to their final target membrane (Feyder et  
48 al., 2015; Viotti 2016). In vesicular membrane trafficking, the nature of the protein  
49 cargo and relevant adaptor proteins play central roles in deciding the routes followed  
50 and the final destination of cargoes. Despite the emerging evidence of alternative or  
51 non-conventional trafficking routes, cargo passage through a continuously maturing  
52 early-to-late Golgi is considered to be part of the major mechanism and the most  
53 critical step in membrane protein sorting. Following exit from the trans-Golgi network  
54 (TGN, also known as late-Golgi), cargoes packed in distinct vesicles travel to their  
55 final destination, which in most cases is the plasma membrane or the vacuole. This  
56 anterograde vesicular movement can be direct or via the endosomal compartment, and  
57 in any case assisted by motor proteins and the cytoskeleton (Bard and Malhotra 2006;  
58 Cai et al., 2007; Hunt and Stephens 2011; Anitei and Hoflack 2011; Guo et al., 2014).  
59 Membrane protein cargoes at the level of late Golgi can also follow the opposite  
60 route, getting sorted into retrograde vesicles, recycling back to an earlier  
61 compartment. Acquiring a “ticket” for a specific route implicates adaptors and  
62 accessory proteins, several of which are also associated with clathrin (Nakatsu and  
63 Ohno 2003; Robinson 2004; 2015).

64         Apart from the COPI and COPII vesicle coat adaptors that mediate traffic  
65 between the ER and the early Golgi compartment (Lee et al., 2004; Zanetti et al.,  
66 2011), of particular importance are the heterotetrameric AP (formally named after

67 Assembly Polypeptide and later as Adaptor Protein) complexes, comprising of two  
68 large subunits (also called adaptins;  $\beta$ -adaptin and  $\gamma$ - or  $\alpha$ -adaptin), together with a  
69 medium-sized ( $\mu$ ) and a small ( $\sigma$ ) subunit (Robinson 2004; 2015). Other adaptors,  
70 some of which display similarity to AP subunits, like the GGAs, epsin-related  
71 proteins, or components of the exomer and retromer complexes are also critical for the  
72 sorting of specific cargoes (Bonifacino 2004; 2014; Robinson 2015; Spang 2015;  
73 Anton et al., 2018). Importantly, the various cargo sorting routes are often  
74 overlapping and might share common adaptors (Hoya et al., 2017). Among the major  
75 AP complexes (Bonifacino 2014; Nakatsu et al., 2014), AP-1 and AP-2, which in  
76 most cells work to propel vesicle formation through recruitment of clathrin, are the  
77 most critical for cell homeostasis and function (Robinson 2004; 2015). In brief, AP-2  
78 is involved in vesicle budding for protein endocytosis from the PM, whereas AP-1 is  
79 involved in vesicle pinching-off from the TGN and/or endosomal compartments,  
80 although in the latter case it is still under debate whether secretory vesicles derive  
81 from the TGN, from the endosome, or from both (Nakatsu et al., 2014; Robinson  
82 2015). AP-1 was also shown to be responsible for retrograde transport from early  
83 endosomes in both yeast and mammalian cells, but also guiding recycling pathways  
84 from the endosome to the plasma membrane in yeast (Spang 2015). The undisputed  
85 essentiality of AP-1 and AP-2 in mammalian cells is however less obvious in simple  
86 unicellular eukaryotes, such as the yeasts *Saccharomyces cerevisiae* or  
87 *Schizosaccharomyces pombe*, where null mutants in the genes encoding AP subunits  
88 are viable, with only relatively minor growth or morphological defects (Meyer et al.,  
89 2000; Valdivia *et al.* 2002; Ma et al., 2009; Yu et al., 2013; Arcones et al., 2016). In  
90 sharp contrast, the growth of AP-1 and AP-2 null mutants in the filamentous fungus  
91 *Aspergillus nidulans* is severely arrested after spore germination (Martzoukou et al.,

92 2017 and results presented herein), reflecting blocks in essential cellular processes,  
93 probably similar to mammalian cells.

94 In the recent years, *A. nidulans* is proving to be a powerful emerging system  
95 for studying membrane cargo traffic (Momany 2002; Taheri-Talesh et al., 2008;  
96 Steinberg et al., 2017). This is not only due to its powerful classical and reverse  
97 genetic tools, but also due to its specific cellular characteristics and way of growth. *A.*  
98 *nidulans* is made of long cellular compartments (hyphae), characterized by polarized  
99 growth, in a process starting with an initial establishment of a growth site, followed  
100 by polarity maintenance and cell extension through the regulated continuous supply of  
101 vesicles towards the apex. A vesicle sorting terminal at the hyphal apex, termed  
102 Spitzenkörper (Spk), is thought to generate an exocytosis gradient, which when  
103 coupled with endocytosis from a specific hotspot behind the site of growth, termed  
104 endocytic collar, is able to sustain apical growth (Penalva 2015; Schultzhaus and  
105 Shaw 2015; Pantazopoulou 2016; Steinberg et al., 2017). Apical trafficking of  
106 cargoes, traveling from the endoplasmic reticulum (ER) through the different stages  
107 of early (cis-) and late (trans-) Golgi towards their final destination, and apical cargo  
108 endocytosis/recycling, are essential for growth, as null mutations blocking either  
109 Golgi function, microtubule organization or apical cargo recycling are lethal or  
110 severely deleterious (Fischer et al., 2008; Takeshita and Fischer 2011; Penalva 2015;  
111 Pantazopoulou 2016; Steinberg et al., 2017). Curiously, the role of AP complexes in  
112 *A. nidulans* or any other filamentous fungus, has not been studied, with the exception  
113 of our recent work on AP-2 (Martzoukou et al., 2017). In that study we showed that  
114 the AP-2 of *A. nidulans* has a rather surprising clathrin-independent essential role in  
115 polarity maintenance and growth, related to the endocytosis of specific polarized  
116 cargoes involved in apical lipid and cell wall composition maintenance. This was in

117 line with the observation that AP-2  $\beta$  subunit ( $\beta 2$ ) lacks the ability to bind clathrin,  
118 which itself has been shown to be essential for the endocytosis of distinct cargoes, as  
119 for example various transporters (Martzoukou et al., 2017; Schultzhaus et al., 2017).  
120 In the current study, we focus on the role of the AP-1 complex in cargo trafficking in  
121 *A. nidulans*. We provide evidence that AP-1 is essential for fungal polar growth via its  
122 dynamic role in post-Golgi secretory vesicle polar sorting, proper microtubule  
123 organization and endosome recycling.

124

## 125 **Results**

### 126 **The AP-1 complex localizes polarly in distinct cytoplasmic structures and is** 127 **essential for growth**

128 In *A. nidulans*, the AP-1 adaptor complex is encoded by the genes AN7682 (*ap-1 $\sigma$* ),  
129 AN4207 (*ap-1 $\gamma$* ), AN3029 (*ap-1 $\beta$* ) and AN8795 (*ap-1 $\mu$* ). In a previous study a  
130 knockout of the gene encoding the AP-1  $\sigma$  subunit proved lethal, therefore we  
131 employed a conditional knock-down strain (Martzoukou et al., 2017), using the  
132 thiamine-repressible promoter *thiA<sub>p</sub>* (Apostolaki et al., 2012). The phenotypic analysis  
133 of this strain showed that repression of *ap1 $\sigma$*  results in severely retarded colony  
134 growth, reflected at the microscopic level in wider and shorter hyphae with increased  
135 numbers of side branches and septa. Figure 1A and 1B highlight these results, further  
136 showing that *thiA<sub>p</sub>*-dependent full repression of not only *ap-1 $\sigma$* , but also *ap-1 $\beta$*  and *ap-*  
137 *1 $\mu$* , results in lack of growth. Notably, besides increased numbers of side branches and  
138 septa, staining level and cortical localization of calcofluor white are modified upon  
139 repression of AP-1 $\sigma$ , suggesting altered chitin deposition (Figure 1B). Given that the  
140 genetic disruption of three AP-1 subunits appears to affect growth in *A. nidulans*

141 similarly and also that the inactivation of any subunit has been reported to disrupt the  
 142 full complex in other organisms (Robinson 2015 and refs therein), the AP-1<sup>σ</sup> subunit  
 143 was chosen to further investigate the role of the AP-1 complex in intracellular cargo  
 144 trafficking pathways.

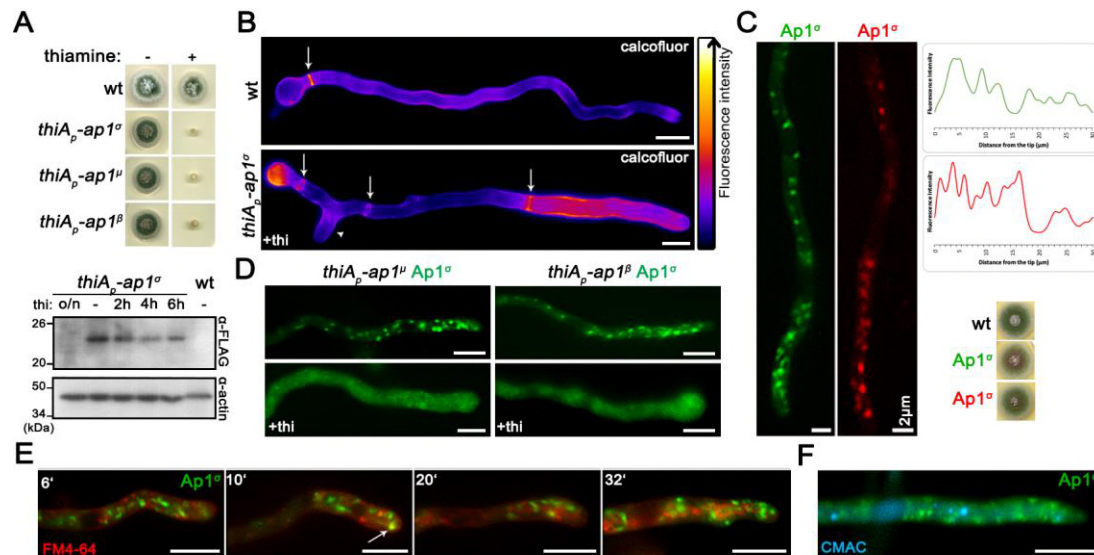

145

146 **Figure 1. The AP-1 complex localizes in distinct polarly distributed structures**  
 147 **and is essential for growth**

148 (A) Upper panel: Growth of isogenic strains carrying thiamine-repressible alleles of  
 149 *ap1<sup>σ</sup>*, *ap1<sup>μ</sup>* and *ap1<sup>β</sup>* (*thiA<sub>p</sub>-ap1<sup>σ</sup>*, *thiA<sub>p</sub>-ap1<sup>μ</sup>* and *thiA<sub>p</sub>-ap1<sup>β</sup>*) compared to wild-type  
 150 (*wt*) in the absence (-) or presence (+) of thiamine. Lower panel: Western blot analysis  
 151 comparing protein levels of FLAG-Ap1<sup>σ</sup> in the absence (0h) or presence of thiamine,  
 152 added for 2, 4, 6 or 16h (overnight culture, o/n). *wt* is a standard wild-type strain  
 153 (untagged *ap1<sup>σ</sup>*) which is included as a control for the specificity of the α-FLAG  
 154 antibody. Equal loading is indicated by actin levels. (B) Microscopic morphology of  
 155 hyphae in a strain repressed for *ap1<sup>σ</sup>* expression (+thi, lower panel) compared to *wt*  
 156 (upper panel) stained with calcofluor white. Septal rings and side branches are  
 157 indicated by arrows and arrowheads. Notice the differences in the calcofluor  
 158 deposition at the hyphal head, tip and the sub apical segment (Lookup table [LUT]  
 159 fire [ImageJ, National Institutes of Health]) (C) Subcellular localization of Ap1<sup>σ</sup>-GFP  
 160 and Ap1<sup>σ</sup>-mRFP in isogenic strains and relative quantitative analysis of fluorescense  
 161 intensity (right upper panel), highlighting the polar distribution of Ap1<sup>σ</sup>. Growth tests  
 162 showing that the tagged versions of Ap1<sup>σ</sup> are functional (right lower panel). (D)  
 163 Subcellular localization of Ap1<sup>σ</sup>-GFP in isogenic strains carrying thiamine-repressible  
 164 alleles of *ap1<sup>μ</sup>* (left panels) or *ap1<sup>β</sup>* (right panels) in the absence (upper panels) or  
 165 presence of thiamine (+thi, o/n). Notice that repression of expression of either the μ or  
 166 the β subunit leads to diffuse cytoplasmic fluorescent of Ap1<sup>σ</sup>. (E) Subcellular  
 167 localization of Ap1<sup>σ</sup>-GFP in the presence of FM4-64, which labels dynamically  
 168 endocytic steps (PM, early endosomes, late endosomes/vacuoles). Notice that Ap1<sup>σ</sup>-  
 169 GFP structures do not co-localize with FM4-64, except a few cases observed in the

170 sub-apical region (indicated with an arrow at the 10 min picture). (F) Subcellular  
171 localization of Ap1<sup>σ</sup>-GFP in the presence of the vacuolar stain 7-amino-4-  
172 chloromethylcoumarin (Blue CMAC). No Ap1<sup>σ</sup>-GFP/CMAC co-localization is  
173 observed. Unless otherwise stated, scale bars represent 5 μm.

174 Figure 1C shows that expression of functional GFP- or mRFP-tagged AP-1<sup>σ</sup>  
175 has distinct localization in cytoplasmic puncta, the motility of which resembles a  
176 Brownian motion, being more abundant in the apical region of hyphae and apparently  
177 absent from the Spk. The distinct localization of AP-1<sup>σ</sup> localization, which resembles  
178 the distribution of Golgi markers (see later), is lost and replaced by a fluorescence  
179 cytoplasmic haze when the β or μ subunits are knocked-down (Figure 1D).  
180 Noticeably, the majority of these foci are not stained by FM4-64 or CMAC (Figure  
181 1E, 1F), strongly suggesting that they are distinct from endosomes and vacuoles.

182

### 183 **Knockdown of AP-1 affects the localization of polarly localized cargoes**

184 As mentioned in the Introduction, polarized growth of fungal hyphae is sustained by  
185 the continuous delivery of cargo-containing secretory vesicles (SV) towards the  
186 hyphal apex and accumulation at the Spk before fusion with the plasma membrane  
187 (PM). Once localized in the PM at the hyphal apex, several cargoes diffuse laterally  
188 and get recycled through the actin-patch enriched subapical regions of the endocytic  
189 collar, balancing exocytosis with endocytosis (Harris 2005; Steinberg 2007; Berepiki  
190 et al., 2011; Takeshita et al., 2014; Penalva et al., 2017; Steinberg et al., 2017; Zhou et  
191 al., 2018). In order to study the potential implications of the AP-1 complex in these  
192 processes, we monitored the localization of specific established apical and collar  
193 markers in conditions where the *ap-1<sup>σ</sup>* expression has been fully repressed. These  
194 markers include the secretory v-SNARE SynA and t-SNARE SsoA (Taheri-Talesh et  
195 al., 2008), the phospholipid flippases DnfA and DnfB that partially localize in the Spk



196 (Schultzhaus et al., 2015), the class III chitin synthase ChsB known to play a key role  
197 in hyphal tip growth and cell wall integrity maintenance (Yanai et al., 1994; Takeshita  
198 et al., 2015), the tropomyosin TpmA decorating actin at the Spk and on actin cables at  
199 the hyphal tip (Taheri-Talesh et al., 2008), and finally the endocytic patch specific  
200 marker AbpA marking the sites of actin polymerization (Araujo-Bazán et al., 2008),  
201 along with the endocytic markers SlaB and SagA (Araujo-Bazán et al., 2008; Hervás-  
202 Aguilar and Peñalva, 2010; Karachaliou et al., 2013). Additionally, we also tested the  
203 localization of the UapA xanthine-uric acid transporter, for which our previous work  
204 suggested that it is not affected by the loss of function of the AP-1 complex  
205 (Martzoukou et al., 2017).

206 Figure 2 highlights our results, which show that the localization of all markers  
207 tested is affected in the absence of AP-1<sup>σ</sup>, with the only clear exception being the  
208 plasma membrane transporter UapA. Additionally, the general positioning of nuclei  
209 also appears unaffected as indicated by labeled Histone 1 (Nayak et al., 2010). Of the  
210 markers tested, SynA, DnfA, DnfB and ChsB lose significantly their polar distribution  
211 and do not seem to properly reach the Spk, concomitant with their increased presence  
212 in distinct, rather static, cytoplasmic puncta of various sizes. The non-polar  
213 distribution of SsoA is generally conserved, but its cortical positioning is reduced and  
214 replaced by numerous cytoplasmic puncta. All collar-associated markers (SagA, SlaB  
215 and AbpA) appear “moved” in an acropetal manner towards the hyphal tip. TpmA has  
216 also lost its proper localization at the hyphal tip, suggesting defective stabilization of  
217 actin filaments at the level of the Spk (Bergs et al., 2016). For relative quantification  
218 of fluorescence intensity see also Figure 2 Supplement 1.

219 Previous studies have shown that mutations preventing endocytosis of polar  
220 markers result in a uniform rather than polarized distribution of cargoes (Schultzhaus

221 et al., 2015; Schultzhaus and Shaw, 2016; Martzoukou et al., 2017). In contrast, when  
222 exocytosis is impaired due to the absence of clathrin, several cargoes show  
223 predominantly non-cortical cytoplasmic localization (Martzoukou et al., 2017). Thus,  
224 our present observations strongly suggest that secretion and/or recycling is the process  
225 blocked in the absence of the AP-1 complex, while endocytosis remains functional.  
226 The latter is further supported by the fact that repression of AP-1 in the absence of a  
227 functional AP-2 complex, results in significant apparent cortical retention of specific  
228 cargoes, such as DnfA, despite the concurrent subapical accumulation of cytoplasmic  
229 DnfA-labeled structures (Figure 2B), which notably do not co-localize with endocytic  
230 membranes stained by FM4-64 (Figure 2 Supplement 2).

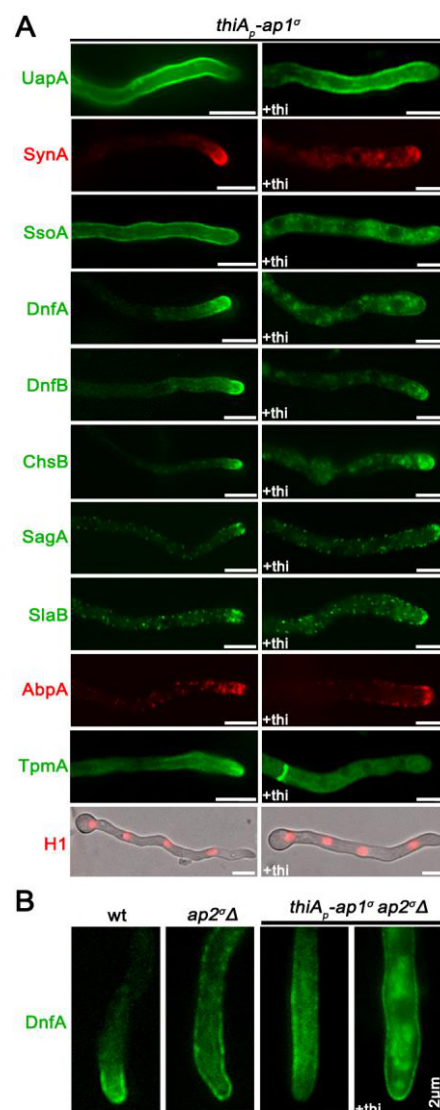

232 **Figure 2. Lack of expression of AP-1 affects the topology of polar cargoes**

233 (A) Comparison of the cellular localization of specific GFP- or mRFP/mCherry-  
234 tagged protein cargoes under conditions where *ap1<sup>σ</sup>* is expressed (left panel) or fully  
235 repressed by thiamine (right panel, +thi). The cargoes tested are the UapA transporter,  
236 the SNAREs SynA and SsoA, phospholipid flippases DnfA and DnfB, chitin synthase  
237 ChsB, endocytic markers SagA and SlaB, the actin-polymerization marker AbpA,  
238 tropomyosin TpmA, and histone H1 (i.e. nuclei). Notice that when *ap1<sup>σ</sup>* is fully  
239 repressed polar apical cargoes are de-polarized and mark numerous relatively static  
240 cytoplasmic puncta. (B) Localization of DnfA-GFP in strains carrying the *ap2<sup>σ</sup>Δ* null  
241 allele, or the *ap2<sup>σ</sup>Δ* null allele together with the repressible *thiA<sub>p</sub>-ap1<sup>σ</sup>* allele, or an  
242 isogenic wild-type control (*wt: ap2<sup>σ+</sup> ap1<sup>σ+</sup>*). Notice that loss of polar distribution due  
243 to defective apical endocytosis observed the *ap2<sup>σ</sup>Δ* strains (Martzoukou et al., 2017)  
244 persists when AP-1<sup>σ</sup> is also repressed, indicating that in the latter case the majority of  
245 accumulating internal structures are due to problematic exocytosis of DnfA. Unless  
246 otherwise stated, scale bars represent 5 μm.

247

248 **AP-1 associates transiently with the trans-Golgi**

249 In *A. nidulans*, the process of maturation of Golgi has been extensively studied  
250 (Peñalva 2010; Pantazopoulou 2016; Steinberg et al., 2017). The markers syntaxin  
251 SedV<sup>Sed5</sup> and the human oxysterol-binding protein PH domain (PH<sup>OSBP</sup>) are well-  
252 established markers to follow the dynamics of early/cis-Golgi (Pinar et al., 2013) and  
253 late/trans-Golgi compartments (Pantazopoulou and Peñalva, 2009), respectively. Here  
254 we examined the possible association of the AP-1 complex with Golgi compartments  
255 using these markers. Figure 3A shows that AP-1<sup>σ</sup> shows no co-localization, despite  
256 some topological proximity, with the early-Golgi, although in some cases it orbits  
257 around SedV marker (see also Video 1). Contrastingly, most AP-1<sup>σ</sup> labeled structures  
258 show a significant degree of apparent association with PH<sup>OSBP</sup>, which suggests AP-1  
259 partially co-localizes with the late-Golgi (Figure 3B, see also Video 2). Notably, the  
260 degree of association of AP-1 with PH<sup>OSBP</sup> has a transient character, as seen by the  
261 apparent progressive loss of co-localization. The increased association of AP-1<sup>σ</sup> with  
262 late-Golgi is further supported by the effect of Brefeldin A, which leads to transient

263 Golgi collapse in aggregated bodies, several of which included the AP-1 marker  
264 (Figure 3C). Thermosensitive mutations in SedV (SedV-R258G) or the regulatory  
265 GTPase RabO<sup>Rab1</sup> (RabO-A136D) are known to lead to early- or early/late-Golgi  
266 disorganization upon shift to the restrictive temperature (Pinar et al., 2013). These  
267 mutations led to AP-1<sup>σ</sup> subcellular distribution modification, further supporting the  
268 association of AP-1 with late, but not with early Golgi. In particular, in SedV-R258G,  
269 AP-1<sup>σ</sup> localization was less affected, whereas in RabO-A136D AP-1<sup>σ</sup> fluorescence  
270 was significantly de-localized from distinct puncta to a cytoplasmic haze (Figure 3D).  
271 Finally, knockdown of RabC<sup>Rab6</sup>, another small GTPase responsible for Golgi  
272 network organization, also results in smaller AP-1<sup>σ</sup> foci (Figure 3D), resembling the  
273 fragmented Golgi equivalents observed for PH<sup>OSBP</sup> in a *rabCΔ* genetic background  
274 (Pantazopoulou and Penalva, 2011).

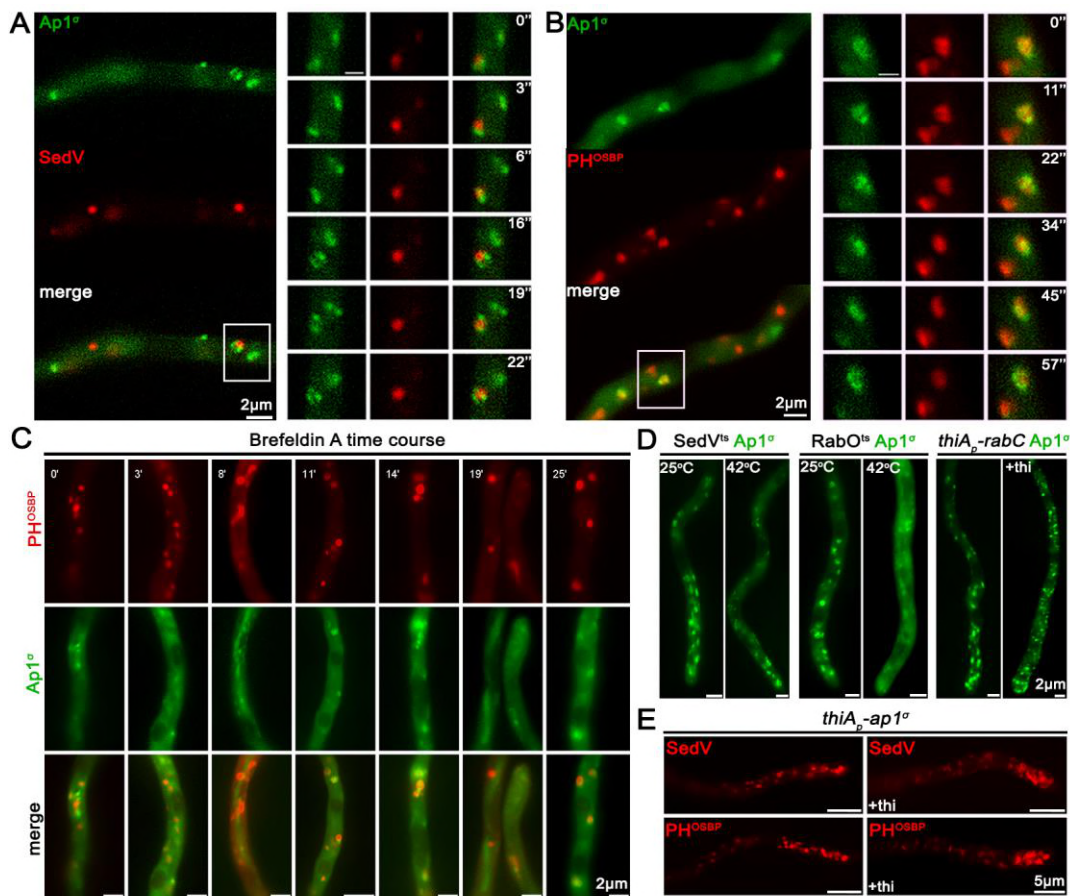

275

276 **Figure 3: AP-1 associates transiently with the late-Golgi**

277 (A, B) Subcellular localization of Ap1<sup>σ</sup>-GFP relative to *cis*- (SedV-mCherry) and  
278 *trans*-Golgi (PH<sup>OSBP</sup>-mRFP) markers. Notice that Ap1<sup>σ</sup> co-localizes significantly with  
279 the *trans*-Golgi marker PH<sup>OSBP</sup>, but not with the *cis*-Golgi marker SedV. This co-  
280 localization is dynamic and transient, as shown in selected time lapse images on the  
281 right panels (see also relevant Videos 1 and 2). (C) Subcellular localization of Ap1<sup>σ</sup>  
282 and PH<sup>OSBP</sup> in the presence of the inhibitor Brefeldin A, showing that a fraction of  
283 Brefeldin bodies (i.e. collapsed Golgi membranes) includes both markers, further  
284 supporting a transient AP-1/late Golgi association. (D) Subcellular localization of  
285 Ap1<sup>σ</sup> in SedV<sup>ts</sup> or RabO<sup>ts</sup> thermosensitive mutants or a strain carrying a repressible  
286 *rabC* allele. These strains are used as tools for transiently blocking proper Golgi  
287 function. Notice that at the restrictive temperature (42 °C) Ap1<sup>σ</sup> fluorescence becomes  
288 increasingly diffuse mostly in the RabO<sup>ts</sup> mutant, whereas under RabC repressed  
289 conditions small Ap1<sup>σ</sup>-labeled puncta increase in number. These results are  
290 compatible with the notion that AP-1 proper localization necessitates wild-type Golgi  
291 dynamics. (E) Distribution of early and late Golgi markers SedV and PH<sup>OSBP</sup> relative  
292 to *apl*<sup>σ</sup> expression or repression (+thi). Notice the effect of accumulation of Golgi  
293 towards the hyphal apex under repressed conditions. Unless otherwise stated, scale  
294 bars represent 5 μm.

295 Importantly, knockdown of AP-1 had a moderate but detectable effect on the overall  
296 picture of early- or late-Golgi markers, which in this case seem re-located in the  
297 subapical region of the hypha, thus showing increased polarization (Figure 3E; Figure  
298 3 Supplement 1). The significance of this observation is discussed later.

299

300 **AP-1 associates with Clathrin via specific C-terminal motifs**

301 AP-1 and AP-2 association with clathrin is considered as a key interaction mediating  
302 the recognition of cargo prior to clathrin cage assembly in metazoa (Robinson, 2015).  
303 Clathrin-binding motifs, or boxes, have been identified in the hinge regions of the β  
304 subunits (Dell'Angelica et al., 1998). In *A. nidulans*, clathrin light and heavy chains  
305 have been recently visualized (Martzoukou et al., 2017; Schultzhaus et al., 2017) and  
306 shown to dynamically decorate the late Golgi, also coalescing after Brefeldin A  
307 treatment (Schultzhaus et al., 2017). Given that AP-1 was shown here to associate



308 with late-Golgi, we tested whether it also associates with clathrin light and/or heavy  
309 chains, despite having a truncated C-terminal region (Martzoukou et al., 2017).

310 Figures 4A and 4B suggest a high degree of co-localization of AP-1<sup>σ</sup> with both  
311 clathrin light chain, ClaL, and heavy chain, ClaH. In the case of ClaL, co-migrating  
312 foci are often detected with AP-1<sup>σ</sup>, which once formed, move to all dimensions  
313 coherently (see also Video 3). In the case of ClaH, “horseshoe”-like structures appear  
314 to coalesce predominantly, which again are characterized by coherent movement with  
315 AP-1<sup>σ</sup> (see also Video 4).

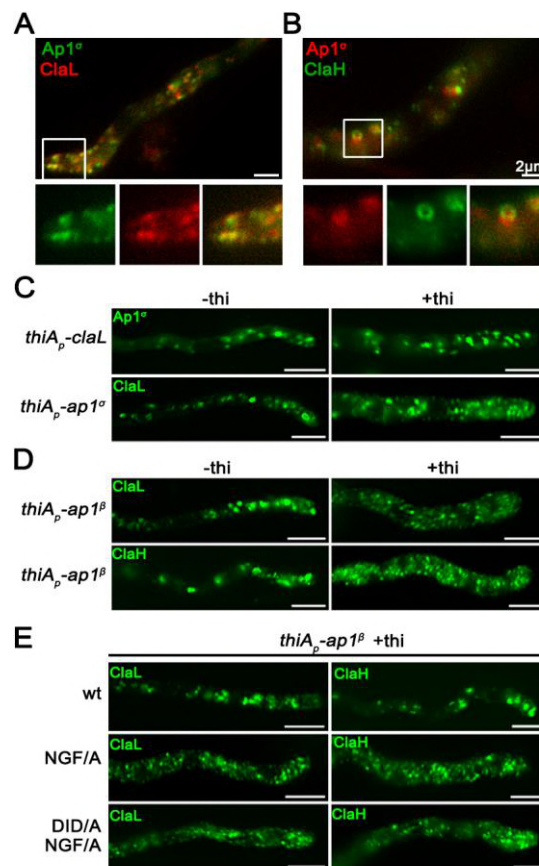

316

317 **Figure 4: C-terminal motifs in AP-1<sup>β</sup> are essential for wild-type clathrin**  
318 **localization**

319 (A, B) Subcellular localization of AP-1<sup>σ</sup> relative to that of clathrin light (ClaL) and  
320 heavy (ClaH) chains. Notice the significant co-localization of AP-1 with both clathrin  
321 chains, also highlighted by the co-migration of the two markers in Videos 3 and 4. (C,  
322 D) Subcellular distribution of AP-1<sup>σ</sup> and clathrin light chain ClaL under conditions  
323 where *claL* or *ap1<sup>σ</sup>* are repressed, respectively (+thi). Notice that repression of ClaL

324 expression has no significant effect on Ap1<sup>σ</sup>-GFP localization, whereas repression of  
325 Ap1<sup>σ</sup> expression leads to more diffuse ClaL fluorescence with parallel appearance of  
326 increased numbers of cytoplasmic puncta. A similar picture is obtained when clathrin  
327 light and heavy chain localization are monitored under conditions of expression /  
328 repression of *apl*<sup>β</sup>. These results are compatible with the idea that clathrin localization  
329 is dependent on the presence of AP-1, but not vice versa. (E) Effect of Ap1<sup>β</sup> C-  
330 terminal mutations modifying putative clathrin binding motifs (<sup>709</sup>NGF/A<sup>711</sup> and  
331 <sup>632</sup>DID/A<sup>634</sup>) on ClaL and ClaH distribution. Notice that replacement of <sup>709</sup>NGF<sup>711</sup>,  
332 and to a lesser extent of <sup>632</sup>DID<sup>634</sup>, by alanines, leads to modification of clathrin  
333 subcellular localization, practically identical to the picture observed in (D) when Ap1<sup>β</sup>  
334 expression is fully repressed. Unless otherwise stated, scale bars represent 5 μm.

335 We also followed the localization of clathrin in the absence of AP-1, and vice  
336 versa, the localization of AP-1 in the absence of clathrin. Results in Figure 4C (upper  
337 panel) show that repression of ClaL expression does not affect the wild-type  
338 localization of AP-1<sup>σ</sup>. In contrast, repression of AP-1<sup>σ</sup> leads to a prominent increase in  
339 rather static, ClaL-containing, cytoplasmic puncta (Figure 4C, lower panel). This  
340 suggests AP-1 functions upstream from ClaL, in line with the established role of AP-1  
341 in clathrin recruitment after cargo binding at late-Golgi or endosomal membranes.

342 Since our results supported a physical and/or functional association of AP-1  
343 with clathrin, we addressed how this could be achieved given that the *A. nidulans* AP-  
344 1<sup>β</sup>, which is the subunit that binds clathrin in metazoa and yeast (Gallusser and  
345 Kirchhausen, 1993), lacks canonical clathrin binding domains in its C-terminal  
346 region, but still possesses putative clathrin boxes (<sup>630</sup>LLDID<sup>634</sup> and <sup>707</sup>LLNGF<sup>711</sup>).  
347 Noticeably, these motifs resemble the LLDLF or LLDFD sequences, found at the  
348 extreme C-terminus of yeast AP-1<sup>β</sup>, which have been shown to interact with clathrin  
349 (Yeung and Payne, 2001). First, we showed that total repression of AP-1<sup>β</sup> expression  
350 leads to a prominent increase in static ClaL or ClaH puncta, compatible with altered  
351 clathrin localization (Figure 4D, upper panels). Then we asked whether the putative  
352 clathrin boxes in AP-1<sup>β</sup> play a role in the proper localization of clathrin. To do so, the  
353 <sup>707</sup>LLNGF<sup>711</sup> or/and <sup>630</sup>LLDID<sup>634</sup> motifs of AP-1<sup>β</sup> were mutated in a genetic

354 background that also possesses a wild-type *ap-1<sup>β</sup>* allele expressed via the repressible  
355 *thiA<sub>p</sub>* promoter. These strains allowed us to follow the localization of clathrin (*claL* or  
356 *claH*) when wild-type or mutant versions of *ap-1<sup>β</sup>* were expressed. Figure 4D (lower  
357 panels) shows that mutations in <sup>707</sup>LLNGF<sup>711</sup>, and to a much lesser extent  
358 <sup>630</sup>LLDID<sup>634</sup>, lead to modification of clathrin localization, similarly to the picture  
359 obtained under total repression of AP-1<sup>β</sup>. Notably, the mutated versions of AP-1<sup>β</sup>  
360 partially restore the growth defects of repressed AP-1<sup>β</sup> (Figure 4 Supplement 1). This  
361 suggests that interaction with clathrin via these boxes is not the primary determinant  
362 for the essentiality of AP-1 in fungal growth.

363

#### 364 **AP-1 associates with RabE<sup>Rab11</sup>-labeled secretory vesicles**

365 The results obtained thus far suggested that the AP-1 complex is involved in post-  
366 Golgi anterograde trafficking of secretory vesicles. In *A. nidulans*, such vesicles  
367 deriving from the late-Golgi, traffic along microtubule tracks towards regulated  
368 discharge at the apical plasma membrane level (Berepiki et al., 2011; Peñalva et al.,  
369 2017; Steinberg et al., 2017; Zhou et al., 2018). Pivotal role in these early processes  
370 plays the small GTPase RabE<sup>Rab11</sup>, which recruited along with its regulators, precedes  
371 and very probably mediates late-Golgi exit of secretory vesicles towards the hyphal  
372 tip (Pantazopoulou et al., 2014; Pinar et al., 2015; Peñalva et al., 2017). Post-Golgi  
373 RabE labeled structures, including the Spk, do not co-localize with endosomes stained  
374 by FM4-64 or late-endosome/vacuoles stained by CMAC (Figure 5A, 5B). In  
375 contrast, they show a significant degree of association with AP-1<sup>σ</sup>, suggesting that the  
376 majority of these vesicles are coated by AP-1 (Figure 5C). This is particularly



377 prominent on foci of subapical regions (Figure 5C, right panels) and also at sites of  
378 newly emerging branches (Figure 5C, left panels).

379 We further examined the association of AP-1 and RabE by following their  
380 localization in relevant knockdown mutants. Given that the knockout of RabE proved  
381 lethal (results not shown), we monitored AP-1 localization in a knockdown strain  
382 where *rabE* expression can be totally repressed via the *thiA<sub>p</sub>* promoter. Similarly, we  
383 followed RabE localization in an analogous AP-1 knockdown mutant. Figure 5D  
384 (upper panel) shows that when RabE is fully repressed AP-1 fluorescence appears  
385 mostly as a cytoplasmic haze, suggesting that AP-1 acts downstream of RabE.  
386 Contrastingly, when AP-1 is repressed, RabE does not reach the Spk, while most  
387 fluorescence dissolves into scattered static puncta (Figure 5D, lower panel). This  
388 strongly suggests that polar secretion of RabE and apparently of secretory vesicles is  
389 blocked.

390 Furthermore, upon repression of *rabE*, crucial apical markers like SynA or  
391 ChsB lose their polar distribution, failing to reach their proper destination at the cell  
392 cortex (Figure 5E, upper panels). This inhibition of targeting appears more dramatic  
393 than the one observed when AP-1 is repressed (see Figure 2), thus indicating the  
394 existence of possible alternative RabE-dependent, but AP-1 independent routes. In  
395 addition, clathrin labeled structures also lose their wild-type distribution under *rabE*  
396 repression conditions, resulting in scattered small puncta (Figure 5E, lower panels),  
397 resembling the phenotype observed for ClaL in the absence of a functional AP-1  
398 complex (see Figure 4C, 4D). Similar polar localization defects are observed in RabE-  
399 labeled secretory vesicles in strains repressed for clathrin light chain, suggesting that  
400 the majority of secretory vesicles requires a clathrin coat to reach the Spk (Figure 5F).  
401 Given the fact that, unlike RabE, neither AP-1<sup>σ</sup> nor clathrin appear to occupy the Spk,

402 it seems that secretory vesicles are uncoated from AP-1 and clathrin prior to their  
 403 localization in Spk, and thus before actin-dependent localization at the apical PM. We  
 404 also tested the relative localization of an apical marker (SynA) and RabE in a genetic  
 405 background where  $Ap1^{\sigma}$  expression can be repressed. When  $Ap1^{\sigma}$  is expressed, SynA  
 406 and RabE co-localize significantly, mostly evident in the Spk, whereas when  $Ap1^{\sigma}$  is  
 407 repressed, co-localization persists but shows a more dispersed pattern and is  
 408 practically absent from of Spk (Figure 5G). This strongly suggests the AP-1 is  
 409 essential for anterograde movement of post-Golgi vesicles.

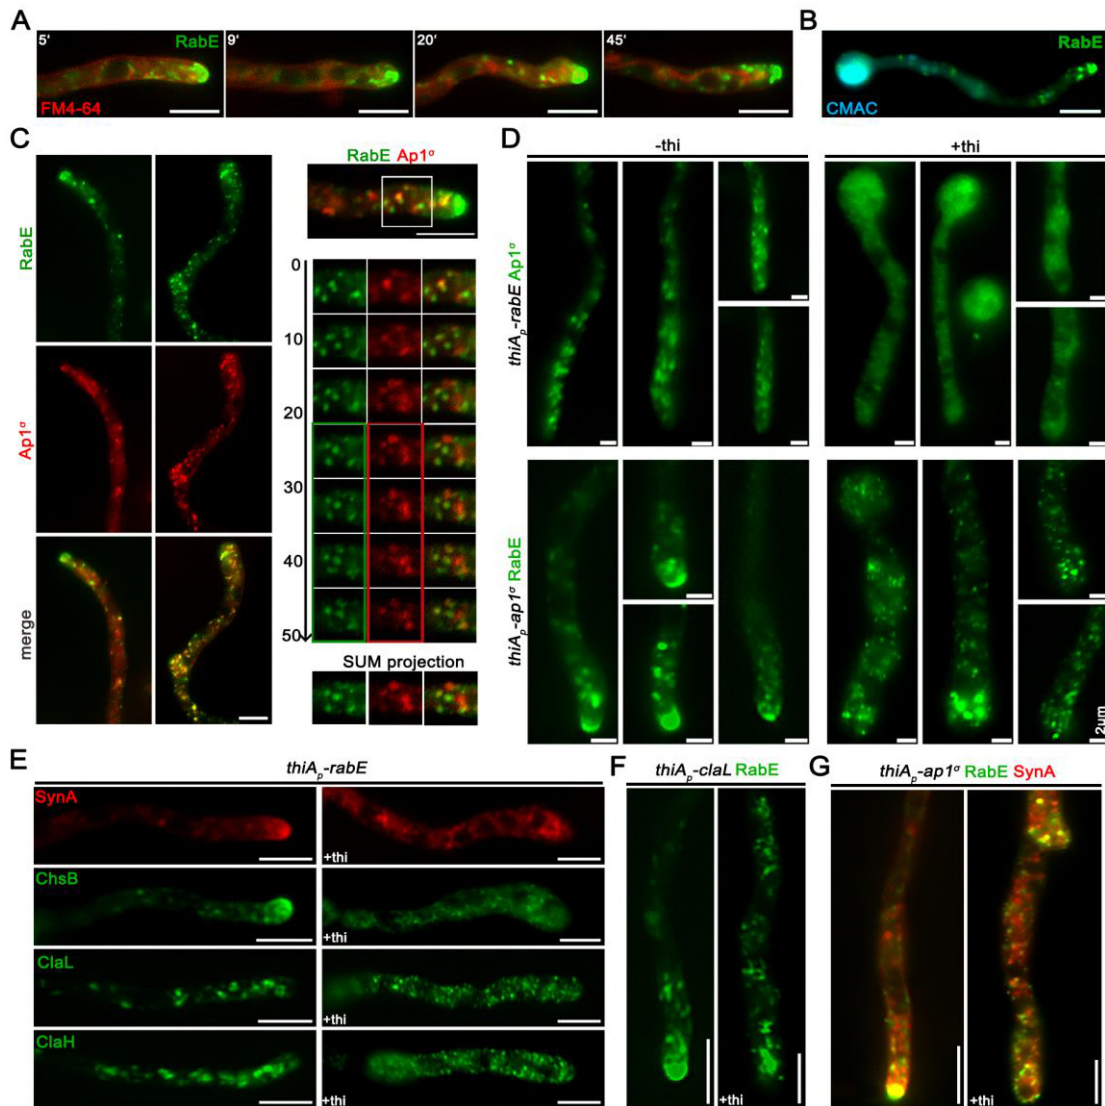

410

411 **Figure 5: AP-1 associates with RabE<sup>Rab11</sup>-labeled secretory vesicles**

412 (A, B) Time course of RabE-GFP localization in the presence of FM4-64 or CMAC,  
413 indicating the non-endocytic character for RabE labeled structures. (C) Subcellular  
414 localization of Ap1<sup>σ</sup>-mRFP and RabE-GFP, showing significant co-localization in  
415 several fluorescent cytoplasmic puncta throughout the hyphae but more prominent at  
416 sub-apical regions and sites of branch emergence. Notice that co-localization is  
417 apparently excluded at the level of Spk, where RabE is prominent, whereas Ap1<sup>σ</sup> is  
418 not. (D) Subcellular localization of Ap1<sup>σ</sup>-GFP or RabE-GFP in strains carrying  
419 thiamine-repressible *thiA<sub>p</sub>-rabE* or *thiA<sub>p</sub>-ap1<sup>σ</sup>* alleles respectively, observed under  
420 conditions of expression (-thi) or repression (+thi). Notice that in the absence of *rabE*  
421 expression Ap1<sup>σ</sup>-labeled fluorescence appears as a cytoplasmic haze rather than  
422 distinct puncta (upper panels), while in the absence of *ap1<sup>σ</sup>* expression, RabE  
423 fluorescence disappears from the Spk and is associated with numerous scattered  
424 bright puncta along the hypha (lower panels - 43.24% uniform distribution and  
425 intensity of puncta, 37.84% more than two brighter puncta close to the apex are  
426 observed, 18.9% one brighter mislocalized punctum at the apex is observed, n=37).  
427 (E) Subcellular localization of SynA, ChsB, ClaL and ClaH in strains carrying the  
428 thiamine-repressible *thiA<sub>p</sub>-rabE* allele, observed under conditions of expression (-thi)  
429 or repression (+thi) of *rabE*. Notice that in all cases the wild-type distribution of  
430 fluorescence is severely affected, resulting in loss of polarized structures and  
431 appearance of an increased number of scattered bright foci, the latter being more  
432 evident in ClaL and ClaH. (F) Localization of RabE-GFP in a strain carrying a  
433 thiamine-repressible *thiA<sub>p</sub>-claL* allele, observed under conditions of expression (-thi)  
434 or repression (+thi) of *claL*. Notice the disappearance of RabE from the Spk and its  
435 association with numerous scattered bright clusters along the hypha, a picture similar  
436 to that obtained in absence of *ap1<sup>σ</sup>* expression in (C). (G) Co-localization analysis of  
437 SynA and RabE in a strain carrying a thiamine-repressible *thiA<sub>p</sub>-ap1<sup>σ</sup>* allele. Notice  
438 that when Ap1<sup>σ</sup> is expressed, SynA and RabE co-localize intensively at the Spk but  
439 also elsewhere along the hypha, whereas when Ap1<sup>σ</sup> expression is repressed (+thi),  
440 both fluorescent signals disappear from the Spk and appear mostly in numerous  
441 scattered and rather immotile puncta, several of which show double fluorescence.  
442 Unless otherwise stated, scale bars represent 5 μm.

443

#### 444 **AP-1 associates with the microtubule cytoskeleton**

445 Previous studies have shown that RabE-labeled secretory vesicles utilize microtubule  
446 tracks and kinesin-1 for their anterograde traffic, and when present at the Spk use  
447 myosin-5 and actin cables to be delivered at the apical PM or eventually move back in  
448 retrograde direction powered by dynein motors (Zhang et al., 2011; Egan et al., 2012;  
449 Peñalva et al., 2017; Steinberg et al., 2017; Zhou et al., 2018). Here, we examined the  
450 possible association of AP-1 with specific dynamic elements of the cytoskeleton  
451 involved in cargo traffic. Figure 6A shows that AP-1 puncta decorate microtubules

452 labeled by alpha-tubulin, TubA. Noticeably, the path of motile AP-1 puncta is in most  
453 cases dictated by the direction of the microtubules. The association with the  
454 microtubule network is further supported by the effect of the anti-microtubule drug  
455 Benomyl, which results in an almost complete, but reversible, disassembly of  
456 microtubules with a parallel increase in Ap1<sup>σ</sup>-GFP labeled cytoplasmic haze (Figure  
457 6B, upper panel, mostly evident at 4-6 min). In contrast, inhibition of F-actin  
458 dynamics via Latrunculin B treatment shows that actin depolymerization does not  
459 lead to detectable modification of AP-1 localization (Figure 6B lower panel). This  
460 result is in agreement with the observation that AP-1 is excluded from the actin  
461 polymerization area.

462 Kinesins are motor proteins involved in the transport of secretory vesicles,  
463 early endosomes, organelles and also mRNA and dynein motors (Egan et al., 2012;  
464 Steinberg 2011; Bauman et al., 2012; Salogiannis and Reck-Peterson, 2017). Based  
465 on previous results showing that kinesin-1 KinA (Konzack et al., 2005; Zekert and  
466 Fischer, 2009) is the main motor responsible for anterograde traffic of RabE-labeled  
467 secretory vesicles, whereas kinesin-3 UncA has no significant role SV secretion  
468 (Peñalva et al., 2017), we tested whether KinA and UncA are involved in powering  
469 the motility of AP-1 on microtubules. The use of strains carrying deletions of KinA  
470 and UncA showed that the motility of AP-1 on microtubules is principally powered  
471 by KinA, the absence of which leads to a re-distribution and apparent “stalling” of  
472 Ap1<sup>σ</sup>- labeled foci at subapical regions, excluding localization at the hyphal tip area  
473 (Figure 6C). This picture is practically identical with the localization of apical  
474 cargoes, such as ChsB, in the absence of KinA (Takeshita et al., 2015). In the case of  
475 UncA, the Ap1<sup>σ</sup>-labeled foci appear to be largely unaffected, however more  
476 prominent localization at the level of Spk and also rather lateral accumulation of



477 relative foci is observed (55,2% of n=25 hyphae) (Figure 6C). These results suggest  
 478 that UncA might have auxiliary roles in the anterograde traffic of Ap1-labeled  
 479 secretory vesicles.

480

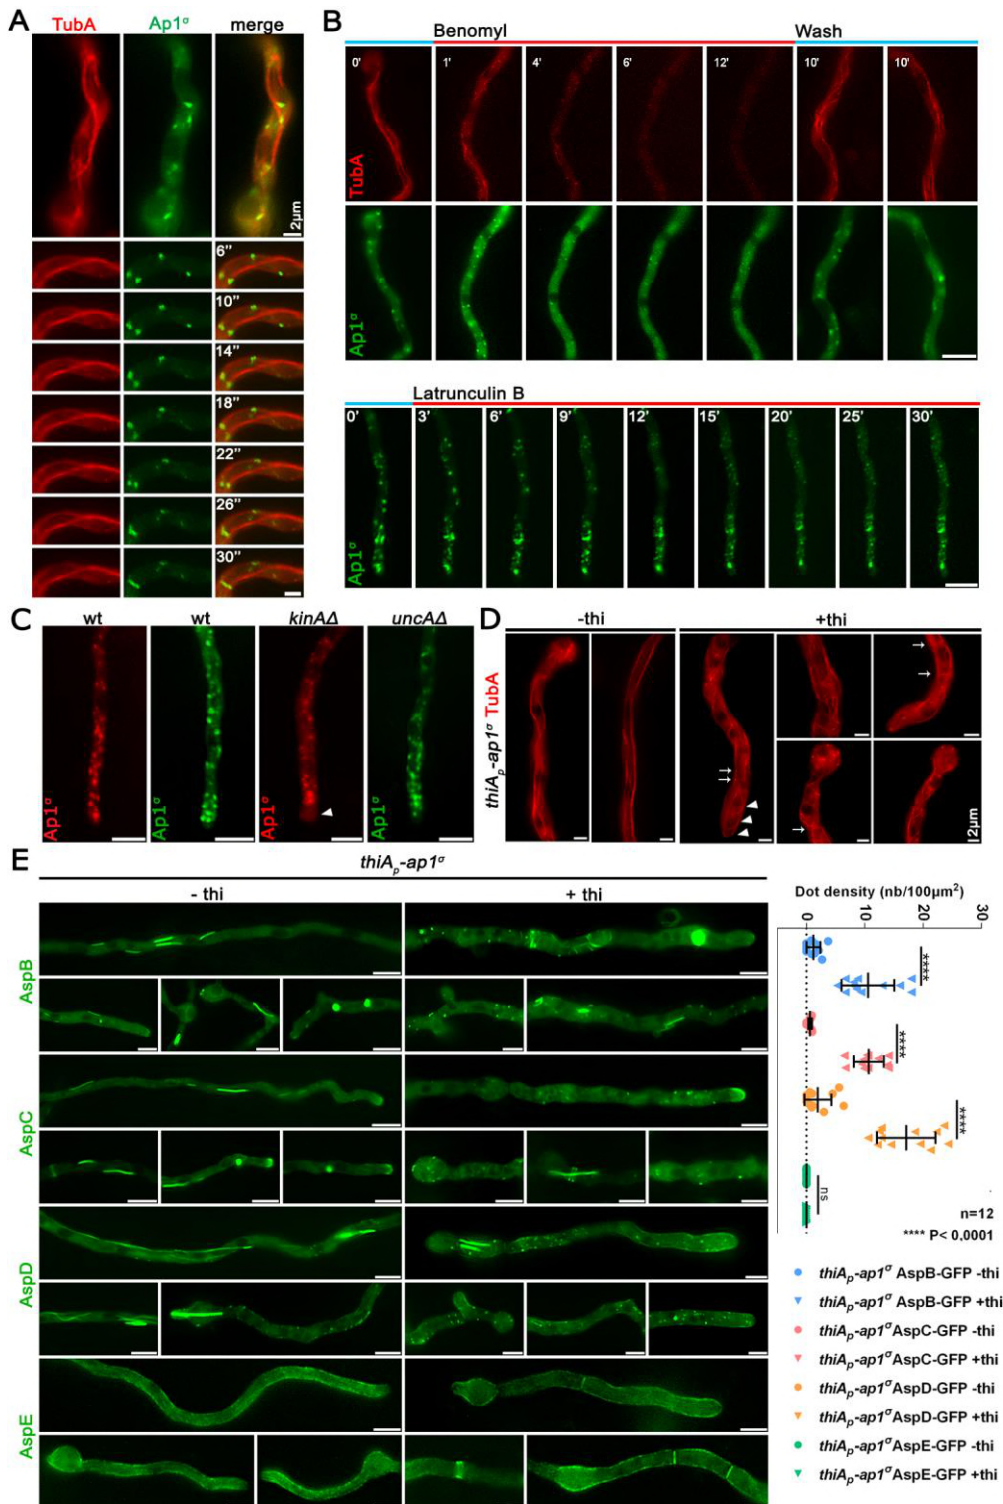

481

482 **Figure 6: AP-1 associates with the cytoskeleton and affects septin organization**

483 (A) Relative Ap1<sup>σ</sup>-GFP and mCherry-TubA ( $\alpha$ -tubulin) subcellular localization.  
484 Notice Ap1<sup>σ</sup> fluorescent foci decorating dynamically TubA-labeled microtubules, as  
485 highlighted in the selected time lapse images on the lower panels. (B) Time course of  
486 treatment of strains expressing Ap1<sup>σ</sup> and TubA with the anti-microtubule drug  
487 Benomyl (upper panels). Notice that Benomyl elicits an almost complete, but  
488 reversible, disassociation of Ap1<sup>σ</sup> and TubA, resulting in diffuse cytoplasmic  
489 florescent signals. Contrastingly, treatment with the anti-actin drug Latrunculin B  
490 does not elicit a significant change in the polar distribution of Ap1<sup>σ</sup> (lower panels).  
491 (C) Subcellular localization of AP-1 in wt and in strains lacking the kinesins KinA  
492 and UncA, respectively. Notice the absence of apical labeling of AP-1 in the *kinAA1*  
493 strain, indicated with an arrowhead. (D) Subcellular organization of the microtubule  
494 network, as revealed by TubA-labeling, in a strain carrying a thiamine-repressible  
495 *thiA<sub>p</sub>-apI<sup>σ</sup>* allele, observed under conditions of expression (-thi) or repression (+thi) of  
496 *apI<sup>σ</sup>*. Notice that the absence of Ap1<sup>σ</sup> leads to a less orientated network, bearing  
497 vertical and curved microtubules, and in some cases the appearance of bright cortical  
498 spots (2-7 puncta/hypha, usually exhibiting perinuclear localization). (E) Subcellular  
499 localization of GFP-tagged versions of septins AspB, AspC, AspD and AspE in a  
500 strain carrying a thiamine-repressible *thiA<sub>p</sub>-apI<sup>σ</sup>* allele, observed under conditions of  
501 expression (-thi) or repression (+thi) of *apI<sup>σ</sup>*. Notice that when *apI<sup>σ</sup>* is repressed,  
502 AspB, AspC and AspD form less higher order structures (HOS) such as filaments or  
503 bars (*apI<sup>+</sup>*: 1.58 HOS/hypha, n=87, *apI<sup>-</sup>*: 0.96 HOS/hypha, n=103) and instead label  
504 more cortical spots (see left panel for quantification), some of which appear as  
505 opposite pairs at both sides of the plasma membrane, resembling septum formation  
506 initiation areas. In contrast, AspE localization remains apparently unaffected under  
507 *apI<sup>σ</sup>* repression conditions. Unless otherwise stated, scale bars represent 5  $\mu$ m.

508 The functional association of AP-1 with the cytoskeleton was also investigated by  
509 following the appearance of microtubules in a strain lacking AP-1. Figure 6D shows  
510 that repression of AP-1 expression led to prominent changes in the microtubule  
511 network, as monitored by TubA-GFP fluorescence. These include more curved  
512 microtubules towards the apex, distinct bright spots at the periphery of the hyphal  
513 head and increased cross sections throughout the hypha, all together suggesting a  
514 possible continuous polymerization at the plus end and a problematic interaction with  
515 actin through cell-end markers (Takeshita et al., 2013; 2014; Zhou et al., 2018).

516

517 **AP-1 is critical for septin organization**

518 Given the role of AP-1 in microtubule organization, we also studied its role on septin  
519 localization. Septins are less well characterized GTP-binding proteins, which form  
520 hetero-polymers associating into higher order structures, and are thought to play a  
521 central role in the spatial regulation and coordination of the actin and microtubule  
522 networks in most eukaryotes (Mostowy and Cossart, 2012; Spiliotis, 2018). In *A.*  
523 *nidulans*, five septins have been under investigation, the four core septins AspA-D,  
524 which form hetero-polymers appearing in various shapes, including spots, rings and  
525 filaments, and a fifth septin of currently unknown function, AspE, not involved in the  
526 hetero-polymer and appearing as dense cortical spots at the proximity of the plasma  
527 membrane (Hernandez Rodriguez and Momany, 2012; Hernandez Rodriguez et al.,  
528 2014; Momany and Talbot, 2017). Figure 6E shows that upon AP-1 repression,  
529 hetero-polymer forming core septins AspB, AspC and AspD appear less in the form  
530 of filamentous structures, while distinct bright cortical spots tend to accumulate at the  
531 hyphal periphery, several of which possibly mark positions of new septa, in  
532 agreement with increased numbers of septa observed in the absence of AP-1.  
533 Interestingly, AspE, appears largely unaffected with the exception of the more  
534 frequent appearance of septa. All the above observations are in agreement with many  
535 other previously described phenotypes associating with AP-1 repression and suggest  
536 an implication of AP-1 in the processes regulating septin polymer formation.  
537 Noticeably, proper endosomal trafficking of septins at growth poles is necessary for  
538 growth in *Ustilago maydis* (Bauman et al., 2014).

539

#### 540 **AP-1 is involved in endosome recycling**

541 The AP-1 complex has also been implicated in anterograde and retrograde traffic  
542 between endosomal compartments and the plasma membrane (Robinson 2004; 2015).

543 However, the existence of relative sorting or recycling endosome, originating from  
 544 early endosomes (EE), has not been shown rigorously in filamentous fungi (Steinberg  
 545 et al., 2017).

546

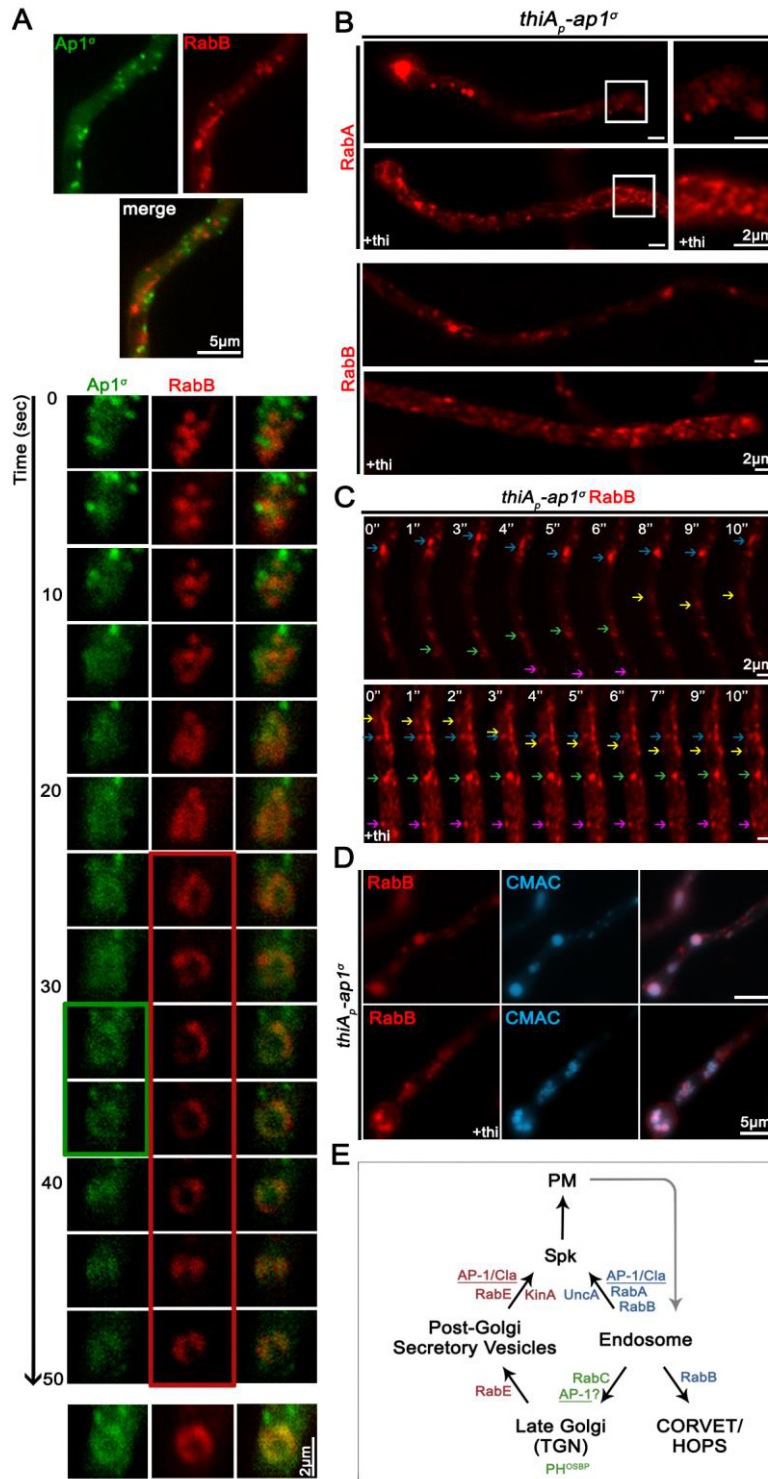

547

548



549 **Figure 7: AP-1 is involved in endosome recycling**

550 (A) Selected time-lapse images showing the relative localization of Ap1<sup>σ</sup> and RabB  
551 (early endosomal marker). Notice the dynamic association of AP-1 with RabB. (B)  
552 Subcellular localization of RabA (upper panels) and RabB (lower panels) in a strain  
553 carrying a thiamine-repressible *thiA<sub>p</sub>-apI<sup>σ</sup>* allele, observed under conditions of  
554 expression (-thi) or repression (+thi) of *apI<sup>σ</sup>*. Notice the increased numbers and  
555 clustering of both endosomal markers in rather immotile puncta when AP-1  
556 expression is repressed. (C) Selected time-lapse images of RabB in a strain carrying a  
557 thiamine-repressible *thiA<sub>p</sub>-apI<sup>σ</sup>* allele, showing that the immotile RabB foci increase  
558 in number when *apI<sup>σ</sup>* is repressed (+thi). However, faster trafficking endosomes can  
559 still be observed, in both retrograde and anterograde direction. (D) Expression of  
560 RabB in a strain carrying a thiamine-repressible *thiA<sub>p</sub>-apI<sup>σ</sup>* allele, stained with  
561 CMAC. Notice that when *apI<sup>σ</sup>* expression is repressed (+thi), most immotile RabB  
562 puncta are stained with CMAC. (E) Working model summarizing major findings on  
563 the role of the AP-1 complex. Unless otherwise stated, scale bars represent 5 μm.

564

565 Major determinants of EE identity are the Rab5 GTPases (Nielsen et al., 1999). The  
566 *A. nidulans* Rab5 paralogues RabA and RabB both localize to early endosomes  
567 moving on microtubule tracks, with RabB appearing also in relatively static late  
568 endosomes. Importantly, the RabA and RabE markers do not co-localize with RabE,  
569 which confirms that motile, anterograde-moving, secretory vesicles and motile  
570 endosomes are distinct entities (Pantazopoulou et al., 2014). Here, we investigated  
571 whether AP-1 associates with Rab5 endosomes.

572 Figure 7A shows that AP-1 exhibits a degree of transient co-migration with  
573 RabB. The coalescence of fluorescence is mostly observed in ring-like structures,  
574 which tend to accumulate and convert to more compact forms, suggesting an  
575 involvement of AP-1 in recycling, without excluding an additional involvement in  
576 vacuolar degradation. Importantly, knockdown of AP-1 led to increased numbers of  
577 both RabA and RabB-labeled endosomes (Figure 7B), the majority of which are  
578 immotile. In fact, the motile subpopulation of endosomes appears unaffected (Figure  
579 7C). In the absence of AP-1, several distinct RabB foci were also stained by CMAC  
580 (Figure 7D), indicating that they are mini-vacuoles, resembling the phenotype of

581 RabA/B in the absence of RabS<sup>Rab7</sup>, a mediator of vacuolar degradation (Abenza et  
582 al., 2012). In summary, all evidence presented above strongly support that AP-1 is  
583 involved primarily in endosome recycling to the PM, and consequently in its absence,  
584 recycling endosomes seem to increase and eventually acquire an identity of  
585 degradative endosomes (see also Figure 7E).

586

## 587 **Discussion**

588 We have previously shown that the AP-2 complex of *A. nidulans* and probably other  
589 higher fungi have a clathrin-independent role in the endocytosis of cargoes necessary  
590 for apical recycling of plasma membrane and cell wall components, and thus for  
591 fungal polar growth maintenance. This was rather unexpected due to the generally  
592 accepted view that AP-2 functions uniquely as a cargo-clathrin adaptor, but also due  
593 to its compromised role in the growth of unicellular fungi. Thus, it seems that sorting  
594 and trafficking mechanisms are genetically and/or physiologically adaptable in order  
595 to meet the specific growth or homeostatic strategies different cells face. In the  
596 present work we functionally analyzed the AP-1 complex of *A. nidulans*, as a  
597 prototypic example of a simple eukaryote that exhibits continuous polar growth, and  
598 showed that AP-1 is indeed essential for cell survival and growth, in a way similar to  
599 metazoan cells (Bonifacino, 2014) and probably plants (Robinson and Pimpl, 2013).  
600 To our knowledge, no previous study has addressed the role of the AP-1 in  
601 filamentous fungi.

602 In yeasts, which do not maintain polar growth and where the microtubule  
603 cytoskeleton is not critical for cargo traffic, AP-1 null mutants are viable, showing  
604 relatively moderate growth defects, which in some cases are associated with  
605 problematic traffic of specific cargoes, such as chitin synthase Chs3 (Valdivia et al.

606 2002; Ma et al., 2009; Yu et al., 2013; Arcones et al., 2016). Yeast AP-1 null mutants  
607 also have minor defects in lipid PtdIns(3,5)P<sub>2</sub>-dependent processes and show reduced  
608 ability to traffic ubiquitylated cargoes to the vacuole lumen (Phelan et al., 2006).  
609 Notably, in *S. cerevisiae*, there are two forms of AP-1 which share the same large  
610 (Apl2 and Apl4) and small (Aps1) subunits, but distinct medium subunits (Apm1 or  
611 Apm2) that seem to confer differential cargo recognition and sorting (Valdivia et al.,  
612 2002; Renard et al., 2010; Whitfield et al., 2016). Additionally, in yeast, the AP-1  
613 complex seems to co-operate with the exomer, a non-essential, fungal-specific  
614 heterotetrameric complex assembled at the trans-Golgi network, for the delivery of a  
615 distinct set of proteins to the plasma membrane (Hoya et al., 2017; Anton et al.,  
616 2018).

617         Contrastingly to yeasts, repression of AP-1 expression in *A. nidulans* leads to  
618 lack of growth, which is related to its inability to maintain apical sorting of all polar  
619 cargoes tested, including those necessary for plasma membrane and cell wall  
620 biosynthesis. Thus, not only the growth phenotype, but also several underlying  
621 cellular defects in AP-1 null mutants resemble those obtained previously with AP-2  
622 loss-of-function mutants (Martzoukou et al., 2017). This is in perfect agreement with  
623 the notion that growth of filamentous fungi, unlike yeasts, requires polar apical  
624 exocytosis combined with subapical endocytosis and recycling to the apex of specific  
625 cargoes related to plasma membrane and cell wall modification (Taheri-Talesh et al.,  
626 2008; Peñalva 2010; Shaw et al., 2011). Overall, results presented herein emphasize  
627 important differences in membrane trafficking mechanisms employed by yeasts and  
628 filamentous fungi, the latter proving a unique genetic and cellular system to dissect  
629 cargo sorting in cells characterized by membrane polarity.

630           Interestingly, despite the similarity in AP-2 and AP-1 phenotypic growth  
631 defects, AP-2 has been shown to act independently of clathrin at the PM, while AP-1  
632 is shown here to associate and function with clathrin at several post-Golgi membrane  
633 trafficking steps. The similarity of effects caused by null mutations in AP-1 and  
634 clathrin chains, concerning RabE<sup>Rab11</sup>-labeled secretory vesicle anterograde traffic and  
635 RabA/B<sup>Rab5</sup>-labeled endosome recycling, constitutes strong evidence that AP-1  
636 function is clathrin-dependent. Interestingly, however, the  $\beta$  subunit of AP-1 of *A.*  
637 *nidulans* and all higher fungi lacks the C-terminal appendage domain that contributes  
638 to clathrin-binding (Martzoukou et al., 2017). Here, we identified specific short motifs  
639 in the C-terminal region of AP-1 <sup>$\beta$</sup>  that proved critical for proper clathrin subcellular  
640 localization and AP-1 function. These motifs (LLNGF and LLDID) resemble motifs  
641 shown previously to bind clathrin in yeast (Yeung and Payne, 2001). Thus,  
642 contrastingly to the fact that clathrin is dispensable for the function of AP-2 in polar  
643 cargo endocytosis it is essential for AP-1-driven polar exocytosis.

644           A novel point of this work concerns the interaction of AP-1 with RabE<sup>Rab11</sup>.  
645 To our knowledge, such an interaction has only been described in a single report in  
646 mammalian cells (Parmar et al., 2016). In this case, Rab11 and AP-1 co-localize with  
647 the reptilian reovirus p14 FAST protein at the TGN. In metazoa, Rab11 acts as a  
648 molecular switch essential for building the necessary molecular machinery for  
649 membrane cargo trafficking to the cell surface via its localization and action at the  
650 trans-Golgi network, post-Golgi vesicles and specialized recycling endosomes (Welz  
651 et al., 2014). In *A. nidulans*, the Rab11 homologue RabE has been previously shown  
652 to mark similar subcellular compartments (e.g. late-Golgi and secretory vesicles) and  
653 to be involved in anterograde moving of cargoes to the Spk and eventually to the  
654 apical PM. Notably, however, RabE does not co-localize with RabA/B<sup>Rab5</sup>-labeled

655 endosomes. The present work strongly suggests that AP-1 and clathrin are  
656 sequentially recruited on cargoes, after RabE-dependent maturation of late-Golgi  
657 membranes to pre-secretory vesicles, and that secreted cargoes travel embedded  
658 within AP-1/clathrin-coated vesicle carriers on MT (see later) to the Spk. At the Spk,  
659 AP-1/clathrin coat is most likely released, but RabE remains until the involvement of  
660 actin in the last step of fusion with the apical PM.

661         The impressive similarity of the *A. nidulans* trafficking mechanisms with  
662 those of higher organisms is also reflected in the absolute need for proper microtubule  
663 (MT) cytoskeleton organization and dynamics (Fischer et al., 2008; Takeshita et al.,  
664 2014). We showed that AP-1 is essential for MT organization and associates with  
665 microtubules, mainly via KinA. Thus, a specific kinesin motor provides the molecular  
666 link between cargo/AP-1/clathrin complexes and cytoskeletal tracks. This is very  
667 similar to what has been found in mammalian epithelial cells, where the molecular  
668 motor kinesin KIF13A connects AP-1 coated secretory vesicles containing mannose-  
669 6-phosphate receptor to microtubule tracks, and thus mediates their transfer from the  
670 TGN to the plasma membrane (Nakagawa et al., 2000). Similarly, in HeLa cells  
671 another motor protein kinesin, KIF5, links TGN-derived endosomal vesicles via a  
672 direct interaction with Gadkin, a  $\gamma$ -BAR membrane accessory protein of the AP-1  
673 complex, with the microtubule cytoskeleton (Schmidt et al., 2009). Thus, tripartite  
674 complexes, including transmembrane cargoes, coat adaptors and motor kinesins, seem  
675 to constitute an evolutionary conserved molecular machinery for membrane protein  
676 subcellular transport in eukaryotes.

677         One simple explanation for the essentiality of AP-1 in proper MT organization  
678 would be that, in its absence, membrane-associated polarity markers, such as Rho  
679 GTPases TeaA or TeaR, which are necessary for microtubule attachment to actin

680 (Fischer et al., 2008; Takeshita and Fischer, 2011; Takeshita et al., 2013; Takeshita  
681 2018), are not sorted correctly in the apex of growing hyphae. Lack of such cell-end  
682 markers is known to result in curved or zigzagged organization of MTs and less  
683 straight hyphae, compatible with the picture we obtained in the AP-1 null mutant.  
684 Importantly, we further supported the essential role of AP-1 in MT organization and  
685 function by showing the dramatic effect of the absence of AP-1 on the subcellular  
686 organization of septins, proteins that play fundamental roles in the ability of diverse  
687 fungi to undergo shape changes and organize the cytoskeleton for polar growth  
688 (Zhang et al., 2017; Momany and Talbot, 2017).

689 Another notable finding of this work concerns the association of AP-1 with  
690 recycling endosomes, which represent a pathway distinct from that of RabE-labeled  
691 secretory vesicles. Thus, it seems that the combined action of two independent  
692 pathways serves the polar distribution of specific cargoes. In *A. nidulans*, early  
693 endosomes (EEs) marked by the homologues of the Rab5 family (RabA and RabB)  
694 are generated via endocytosis and are easily distinguishable due to their high and  
695 long-distance bidirectional motility (Abenza et al., 2009; Steinberg, 2014). A fraction  
696 of EEs matures to less motile late endosomes or Multi-Vesicular Bodies (concurrent  
697 with increased replacing of RabA/B with RabS<sup>Rab7</sup>), which eventually fuse with  
698 vacuoles for cargo degradation (Abenza et al., 2010; 2012; Steinberg, 2014). Another  
699 fraction of EEs, mostly the one localized at the subapical collar region of hyphae  
700 where very active endocytosis takes place, apparently recycles back to the Spk and  
701 from there vesicular cargoes reach the PM (Steinberg, 2014). Whether this takes place  
702 directly or *via* retrograde transport to the late-Golgi and anterograde transport in  
703 secretory vesicles, is not clear and might well depend on the nature of the cargoes  
704 studied. Here we showed that lack of AP-1 leads to a dramatic increase in non-motile



705 RabA/B endosomes, very probably reflecting enhanced maturation into Multi-  
706 Vesicular Body endosomes, which suggests that AP-1 has a critical role in the fueling  
707 of recycling endosomes to the PM or the late-Golgi. Thus, a consequence of the lack  
708 of AP-1 function is compatible with the dramatic increase in static and larger  
709 endosomes observed. Similarly, lack of AP-1 function in mammalian cells leads to  
710 problematic maturation of early endosomes, associated with aberrant recycling in  
711 synapses (Candiello et al., 2016).

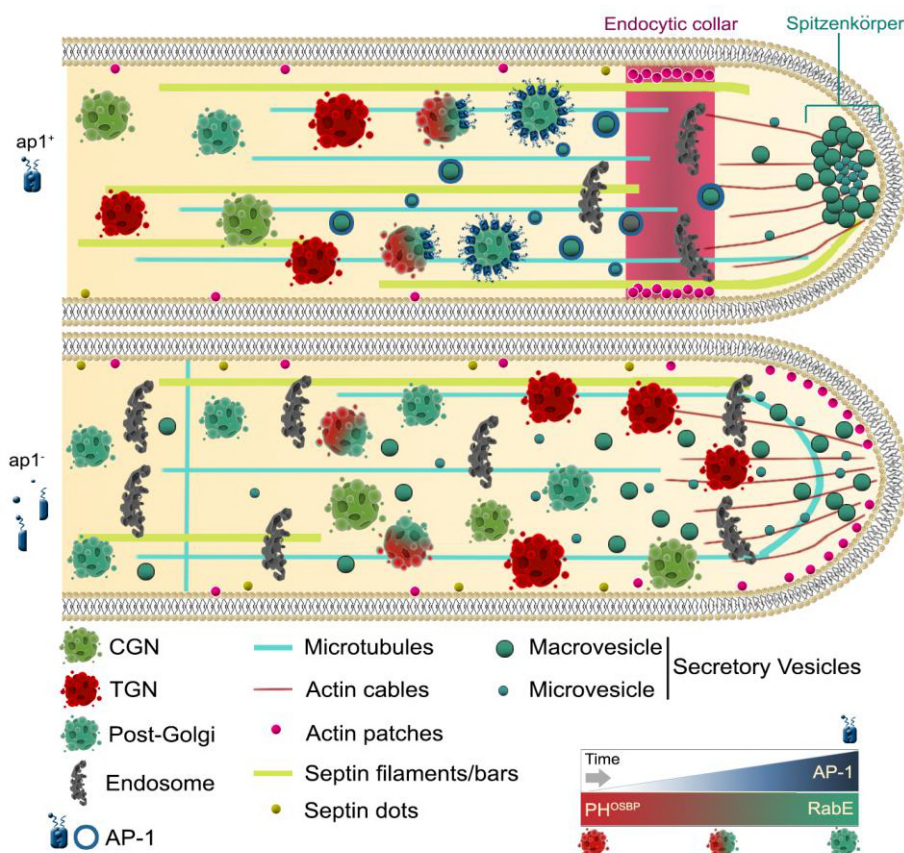

713 **Figure 8:** Highly speculative scheme on the role of AP-1 in *A. nidulans* hyphal tip  
714 growth.

715  
716 Establishing the essential role of AP-1 in polar secretion of specific cargoes in  
717 *A. nidulans* (for a schematic view of our findings see Figure 7E and Figure 8), which  
718 will probably hold true for other filamentous fungi, also opens a novel little-studied  
719 issue. How specific non-polar cargoes are sorted to the plasma membrane? For

720 example, here and previously, we showed that AP-1 and AP-2 complexes are  
721 redundant for the proper subcellular expression of transporters that are homogenously  
722 present in the PM of growing hyphae and which do not show any indication of polar  
723 localization. A critical question to answer is which route(s) and mechanism(s)  
724 transporters, and possibly other non-polar transmembrane cargoes (i.e. channels and  
725 receptors), use for their sorting, endocytosis or recycling. This question also concerns  
726 metazoan and plant cells, where non-polar sorting remains largely understudied.  
727 Finally, under the light of previous results obtained in yeast, metazoa or plants, our  
728 present work highlights the importance of using different model organisms to address  
729 common but evolutionary adaptable mechanisms for membrane cargo traffic in  
730 eukaryotes.

731

## 732 **Materials and methods**

### 733 **Media, strains, growth conditions and transformation**

734 Standard complete and minimal media for *A. nidulans* were used (details in FGSC,  
735 <http://www.fgsc.net>). Media and chemical reagents were obtained from Sigma-  
736 Aldrich (Life Science Chemilab SA, Hellas) or AppliChem (Bioline Scientific SA,  
737 Hellas). Glucose 0.1-1 % (w/v) was used as a carbon source.  $\text{NaNO}_3$  and  $\text{NH}_4^+$   
738 (Ammonium tartrate dibasic) were used as nitrogen sources at 10 mM. Thiamine  
739 hydrochloride (thi) was used at a final concentration of 10  $\mu\text{M}$ . Transformation was  
740 performed as described previously in Koukaki et al. (2003), using an *nkuA* DNA  
741 helicase deficient (TNO2A7; Nayak et al., 2006) recipient strain or derivatives for “in  
742 locus” integrations of gene fusions, or deletion cassettes by the *A. fumigatus* markers  
743 orotidine-5'-phosphate-decarboxylase (AFpyrG, Afu2g0836), GTP-cyclohydrolase II  
744 (AFriboB, Afu1g13300) and a pyridoxine biosynthesis gene (AFpyroA, Afu5g08090),



745 resulting in complementation of auxotrophies for uracil/uridine (*pyrG89*), riboflavin  
746 (*riboB2*) or pyridoxine (*pyroA4*), respectively. Transformants were verified by PCR  
747 and Southern analysis. Combinations of mutations and tagged strains with fluorescent  
748 epitopes, were generated by standard genetic crossing. *E. coli* strains used were *dH5α*.  
749 *A. nidulans* strains used in this study are listed in Supplementary Table 1.

750

### 751 **Nucleic acid manipulations and plasmid constructions**

752 Genomic DNA extraction from *A. nidulans* was performed as described in FGSC  
753 (<http://www.fgsc.net>). Plasmid preparation and DNA gel extraction were performed  
754 using the Nucleospin Plasmid kit and the Nucleospin Extract II kit (Macherey-Nagel,  
755 Lab Supplies Scientific SA, Hellas). Restriction enzymes were from Takara Bio (Lab  
756 Supplies Scientific SA, Hellas). DNA sequences were determined by Eurofins-  
757 Genomics (Vienna, Austria). Southern blot analysis using specific gene probes was  
758 performed as described in Sambrook et al. (1989), using [<sup>32</sup>P]-dCTP labeled  
759 molecules prepared by a random hexanucleotide primer kit and purified on  
760 MicroSpin™ S-200 HR columns (Roche Diagnostics, Hellas). Labeled [<sup>32</sup>P]-dCTP  
761 (3000 Ci mmol<sup>-1</sup>) was purchased from the Institute of Isotops Co. Ltd, Miklós,  
762 Hungary. Conventional PCR reactions, high fidelity amplifications and site-directed  
763 mutagenesis were performed using KAPA Taq DNA and Kapa HiFi polymerases  
764 (Kapa Biosystems, Roche Diagnostics, Hellas). Gene fusion cassettes were generated  
765 by one step ligations or sequential cloning of the relevant fragments in the plasmids  
766 pBluescript SKII, or pGEM-T using oligonucleotides carrying additional restriction  
767 sites. These plasmids were used as templates to amplify the relevant linear cassettes  
768 by PCR. For *apI<sup>β</sup>* site directed mutations the relevant gene was cloned in the pBS-  
769 argB plasmid (Vlanti and Diallinas, 2008). For primers see Supplementary Table 2.

770

771 **Protein extraction and western blots**

772 Cultures for total protein extraction were grown in minimal media supplemented with  
773 NaNO<sub>3</sub> or NH<sub>4</sub><sup>+</sup> at 25° C. Total protein extraction was performed as previously  
774 described (Papadaki et al., 2017). Total proteins (30-50 µg estimated by Bradford  
775 assays) were separated in a polyacrylamide gel (8-10 % w/v) onto PVDF membranes  
776 (Macherey-Nagel, Lab Supplies Scientific SA, Hellas). Immunodetection was  
777 performed with a primary anti-FLAG M2 monoclonal antibody (Sigma-Aldrich), an  
778 anti-actin monoclonal (C4) antibody (MP Biomedicals Europe) and a secondary HRP-  
779 linked antibody (Cell Signaling Technology Inc, Bioline Scientific SA, Hellas). Blots  
780 were developed using the LumiSensor Chemiluminescent HRP Substrate kit  
781 (Genscript USA, Lab Supplies Scientific SA, Hellas) and SuperRX Fuji medical X-  
782 Ray films (FujiFILM Europe).

783

784 **Microscopy and Statistical Analysis**

785 Samples for wide-field epifluorescence microscopy were prepared as previously  
786 described (Martzoukou et al., 2017). Germlings were incubated in sterile 35mm µ-  
787 dishes, high glass bottom (*ibidi*, Germany) in liquid minimal media for 16-22 h at 25°  
788 C. Benomyl, Latrunculin B, Brefeldin A and Calcofluor white were used at final  
789 concentrations of 2.5µg ml<sup>-1</sup>, 100µg ml<sup>-1</sup>, 100µg ml<sup>-1</sup>, 0,001% (w/v), respectively.  
790 FM4-64 and CMAC staining was according to Peñalva (2005) and Evangelinos et al.  
791 (2016), respectively. Images were obtained using a Zeiss Axio Observer Z1/Axio  
792 Cam HR R3 camera. Contrast adjustment, area selection and color combining were  
793 made using the Zen lite 2012 software. Sum Intensity Projections of selected frames  
794 were created using the “Z project” command of ImageJ software. ImageJ Plot profile

795 was used for measurements of fluorescence intensity (<https://imagej.nih.gov/ij/>). For  
796 quantifying dot density in Figure 6, ROIs were selected using the Area Selection tool  
797 and the Spot Detector plugin of ICY (<http://icy.bioimageanalysis.org/>). Tukey's  
798 Multiple Comparison test was performed (One-way ANOVA) using the Graphpad  
799 Prism software for the statistical analysis. Confidence interval was set to 95%. Scale  
800 bars were added using the FigureJ plugin of the ImageJ software. Images were further  
801 processed and annotated in Adobe Photoshop CS4 Extended version 11.0.2.

802

### 803 **Acknowledgments**

804 We thank Reinhard Fischer for the tagged tubulin, chitin synthase and kinesins  
805 strains, Michele Momany for the tagged septins strains and Spyros Efthimiopoulos for  
806 the Anti-FLAG M2 antibody. The current research was supported by the *Fondation*  
807 *Santé*, to which we are grateful. OM is supported through the Action "Doctorate  
808 Scholarships Programs by the State Scholarships Foundation" by IKY and the  
809 European Social Fund (ESF), in the framework of the Operational Program  
810 "Education and Life Long Learning" within the NSRF 2014-2020 of the ESF.

811

### 812 **Author contributions**

813 OM, Data curation, Software, Formal analysis, Investigation, Methodology,  
814 Conceptualization; GD, Conceptualization, Resources, Formal analysis, Funding  
815 acquisition, Validation, Visualization, Manuscript Writing, Project administration;  
816 SA, Data curation, Investigation, Methodology, Conceptualization; Manuscript  
817 Writing.

818

819 **Author ORCIDs**

820 George Diallinas, <http://orcid.org/0000-0002-3426-726X>

821

822

823

824

825 **References**

826 Abenza JF, Galindo A, Pantazopoulou A, Gil C, de los Ríos V, Peñalva MA.  
827 *Aspergillus* RabB Rab5 integrates acquisition of degradative identity with the long  
828 distance movement of early endosomes. *Mol Biol Cell*. 2010 Aug 1;21(15):2756-69.  
829 doi:10.1091/mbc.E10-02-0119.

830

831 Abenza JF, Galindo A, Pinar M, Pantazopoulou A, de los Ríos V, Peñalva MA.  
832 Endosomal maturation by Rab conversion in *Aspergillus nidulans* is coupled to  
833 dynein-mediated basipetal movement. *Mol Biol Cell*. 2012 May;23(10):1889-901.  
834 doi: 10.1091/mbc.E11-11-0925.

835

836 Abenza JF, Pantazopoulou A, Rodríguez JM, Galindo A, Peñalva MA. Long-distance  
837 movement of *Aspergillus nidulans* early endosomes on microtubule tracks. *Traffic*.  
838 2009 Jan;10(1):57-75. doi:10.1111/j.1600-0854.2008.00848.x.

839

840 Anitei M, Hoflack B. Exit from the trans-Golgi network: from molecules to  
841 mechanisms. *Curr Opin Cell Biol*. 2011 Aug;23(4):443-51. doi:  
842 10.1016/j.ceb.2011.03.013.

843

844 Anton C, Valdez Taubas J, Roncero C. The Functional Specialization of Exomer as a  
845 Cargo Adaptor During the Evolution of Fungi. *Genetics*. 2018 Feb 6. pii:  
846 genetics.300767.2018. doi:10.1534/genetics.118.300767.

847

848 Apostolaki A, Harispe L, Calcagno-Pizarelli AM, Vangelatos I, Sophianopoulou V,  
849 Arst HN Jr, Peñalva MA, Amillis S, Scazzocchio C. *Aspergillus nidulans* CkiA is an  
850 essential casein kinase I required for delivery of amino acid transporters to the  
851 plasma membrane. *Mol Microbiol*. 2012 May;84(3):530-49. doi:10.1111/j.1365-  
852 2958.2012.08042.x

853

854 Araujo-Bazán L, Peñalva MA, Espeso EA. Preferential localization of the endocytic  
855 internalization machinery to hyphal tips underlies polarization of the actin  
856 cytoskeleton in *Aspergillus nidulans*. *Mol Microbiol*. 2008 Feb;67(4):891-905.  
857 doi:10.1111/j.1365-2958.2007.06102.x.

858

859 Arcones I, Sacristán C, Roncero C. Maintaining protein homeostasis: early and late  
860 endosomal dual recycling for the maintenance of intracellular pools of the plasma

- 861 membrane protein Chs3. *Mol Biol Cell*. 2016 Dec 15;27(25):4021-4032.  
862 doi:10.1091/mbc.E16-04-0239
- 863
- 864 Bard F, Malhotra V (2006) The formation of TGN-to-plasma-membrane transport  
865 carriers. *Annu Rev Cell Dev Biol* 22:439–455. doi:  
866 10.1146/annurev.cellbio.21.012704.133126
- 867
- 868 Baumann S, König J, Koepke J, Feldbrügge M. Endosomal transport of septin mRNA  
869 and protein indicates local translation on endosomes and is required for correct septin  
870 filamentation. *EMBO Rep*. 2014 Jan;15(1):94-102. doi:10.1002/embr.201338037
- 871
- 872 Baumann S, Pohlmann T, Jungbluth M, Brachmann A, Feldbrügge M. Kinesin-3 and  
873 dynein mediate microtubule-dependent co-transport of mRNPs and endosomes. *J Cell*  
874 *Sci*. 2012 Jun 1;125(Pt 11):2740-52. doi:10.1242/jcs.101212.
- 875
- 876 Berepiki A, Lichius A, Read ND. Actin organization and dynamics in filamentous  
877 fungi. *Nat Rev Microbiol*. 2011 Nov 2;9(12):876-87. doi:10.1038/nrmicro2666.
- 878
- 879 Bergs A, Ishitsuka Y, Evangelinos M, Nienhaus GU, Takeshita N. Dynamics of Actin  
880 Cables in Polarized Growth of the Filamentous Fungus *Aspergillus nidulans*. *Front*  
881 *Microbiol*. 2016 May 9;7:682. doi:10.3389/fmicb.2016.00682.
- 882
- 883 Bonifacino JS. Adaptor proteins involved in polarized sorting. *J Cell Biol*. 2014 Jan  
884 6;204(1):7-17. doi:10.1083/jcb.201310021
- 885
- 886 Bonifacino JS. The GGA proteins: adaptors on the move. *Nat Rev Mol Cell Biol*.  
887 2004 Jan;5(1):23-32. doi:10.1038/nrm1279.
- 888
- 889 Cai H, Reinisch K, Ferro-Novick S (2007) Coats, tethers, Rab, and SNAREs work  
890 together to mediate the intracellular destination of a transport vesicle. *Dev Cell*  
891 12:671–682. doi:10.1016/j.devcel.2007.04.005
- 892
- 893 Candiello E, Kratzke M, Wenzel D, Cassel D, Schu P. AP-1/σ1A and AP-1/σ1  
894 Badaptor-proteins differentially regulate neuronal early endosome maturation via the  
895 Rab5/Vps34-pathway. *Sci Rep*. 2016 Jul 14;6:29950. doi:10.1038/srep29950.
- 896
- 897 Dell'Angelica EC, Klumperman J, Stoorvogel W, Bonifacino JS. Association of the  
898 AP-3 adaptor complex with clathrin. *Science*. 1998 Apr 17;280(5362):431-4. doi:  
899 10.1126/science.280.5362.431
- 900
- 901 Egan MJ, Tan K, Reck-Peterson SL. Lis1 is an initiation factor for dynein-driven  
902 organelle transport. *J Cell Biol*. 2012 Jun 25;197(7):971-82. doi:  
903 10.1083/jcb.201112101.
- 904
- 905 Evangelinos, M., Martzoukou, O., Choroziyan, K., Amillis, S., Diallinas, G. (2016).  
906 BsdA(Bsd2)-dependent vacuolar turnover of a misfolded version of the UapA  
907 transporter along the secretory pathway: prominent role of selective autophagy. *Mol*  
908 *Microbiol*. 100: 893-911. doi:10.1111/mmi.13358
- 909

- 910 Feyder S, De Craene JO, Bär S, Bertazzi DL, Friant S. Membrane trafficking in the  
911 yeast *Saccharomyces cerevisiae* model. *Int J Mol Sci.* 2015 Jan 9;16(1):1509-25. doi:  
912 10.3390/ijms16011509.  
913
- 914 Fischer R, Zekert N, Takeshita N. Polarized growth in fungi-interplay between the  
915 cytoskeleton, positional markers and membrane domains. *Mol Microbiol.* 2008  
916 May;68(4):813-26. doi:10.1111/j.1365-2958.2008.06193.x.  
917
- 918 Gallusser A, Kirchhausen T. 1993. The beta 1 and beta 2 subunits of the AP  
919 complexes are the clathrin coat assembly components. *EMBO J.* 2:5237-5244.  
920
- 921 Guo Y, Sirkis DW, Schekman R. Protein sorting at the trans-Golgi network. *Annu*  
922 *Rev Cell Dev Biol.* 2014;30:169-206. doi:10.1146/annurev-cellbio-100913-013012.  
923
- 924 Harris SD, Read ND, Roberson RW, Shaw B, Seiler S, Plamann M, Momany M.  
925 2005. Polarisome meets Spitzenkörper: microscopy, genetics, and genomics converge.  
926 *Eukaryot Cell.* 4: 225-9. doi:10.1128/EC.4.2.225-229.2005  
927
- 928 Hernández-Rodríguez Y, Masuo S, Johnson D, Orlando R, Smith A, Couto-Rodríguez  
929 M, Momany M. Distinct septin heteropolymers co-exist during multicellular  
930 development in the filamentous fungus *Aspergillus nidulans*. *PLoS One.* 2014 Mar  
931 24;9(3):e92819. doi:10.1371/journal.pone.0092819.  
932
- 933 Hernández-Rodríguez Y, Momany M. Posttranslational modifications and assembly  
934 of septin heteropolymers and higher-order structures. *Curr Opin Microbiol.* 2012  
935 Dec;15(6):660-8. doi:10.1016/j.mib.2012.09.007.  
936
- 937 Hervás-Aguilar A, Peñalva MA. Endocytic machinery protein SlaB is dispensable for  
938 polarity establishment but necessary for polarity maintenance in hyphal tip cells of  
939 *Aspergillus nidulans*. *Eukaryot Cell.* 2010 Oct;9(10):1504-18. doi:10.1128/EC.00119-  
940 10.  
941
- 942 Hoya M, Yanguas F, Moro S, Prescianotto-Baschong C, Doncel C, de León N, Curto  
943 MÁ, Spang A, Valdivieso MH. Traffic Through the Trans-Golgi Network and the  
944 Endosomal System Requires Collaboration Between Exomer and Clathrin Adaptors in  
945 Fission Yeast. *Genetics.* 2017 Feb;205(2):673-690. doi:10.1534/genetics.116.193458.  
946
- 947 Hunt SD, Stephens DJ. The role of motor proteins in endosomal sorting. *Biochem Soc*  
948 *Trans.* 2011 Oct;39(5):1179-84. doi:10.1042/BST0391179.  
949
- 950 Karachaliou M, Amillis S, Evangelinos M, Kokotos AC, Yalelis V, Diallinas G. The  
951 arrestin-like protein ArtA is essential for ubiquitination and endocytosis of the UapA  
952 transporter in response to both broad-range and specific signals. *Mol Microbiol.* 2013  
953 Apr;88(2):301-17. doi:10.1111/mmi.12184.  
954
- 955 Konzack S, Rischitor PE, Enke C, Fischer R. The role of the kinesin motor KipA in  
956 microtubule organization and polarized growth of *Aspergillus nidulans*. *MolBiol Cell.*  
957 2005 Feb;16(2):497-506. doi:10.1091/mbc.E04-02-0083  
958



- 959 Koukaki, M., Giannoutsou, E., Karagouni, A. & Diallynas, G. (2003). A novel  
960 improved method for *Aspergillus nidulans* transformation. *J. Microbiol. Methods*. 55:  
961 687-695. doi:10.1016/S0167-7012(03)00208-2  
962
- 963 Lee MC, Miller EA, Goldberg J, Orci L, Schekman R. Bi-directional protein transport  
964 between the ER and Golgi. *Annu Rev Cell Dev Biol*. 2004;20:87-123.m.  
965 doi:10.1146/annurev.cellbio.20.010403.105307  
966
- 967 Ma Y, Takeuchi M, Sugiura R, Sio SO, Kuno T. Deletion mutants of AP-1 adaptin  
968 subunits display distinct phenotypes in fission yeast. *Genes Cells*. 2009  
969 Aug;14(8):1015-28. doi:10.1111/j.1365-2443.2009.01327.x.  
970
- 971 Martzoukou O, Amillis S, Zervakou A, Christoforidis S, Diallynas G. 2017. The AP-2  
972 complex has a specialized clathrin-independent role in apical endocytosis and polar  
973 growth in fungi. *Elife*. 6: e20083. doi:10.7554/eLife.20083.  
974
- 975 Meyer C, Zizioli D, Lausmann S, Eskelinen EL, Hamann J, Saftig P, von Figura K,  
976 Schu P. mu1A-adaptin-deficient mice: lethality, loss of AP-1 binding and rerouting of  
977 mannose 6-phosphate receptors. *EMBO J*. 2000 May 15;19(10):2193-203.  
978 doi:10.1093/emboj/19.10.2193.  
979
- 980 Momany M, Talbot NJ. Septins Focus Cellular Growth for Host Infection by  
981 Pathogenic Fungi. *Front Cell Dev Biol*. 2017 Apr 5;5:33. doi:  
982 10.3389/fcell.2017.00033.  
983
- 984 Momany M. Polarity in filamentous fungi: establishment, maintenance and new axes.  
985 *Curr Opin Microbiol*. 2002 Dec;5(6):580-5. doi:10.1016/S1369-5274(02)00368-5.  
986
- 987 Mostowy S, Cossart P. Septins: the fourth component of the cytoskeleton. *Nat Rev*  
988 *Mol Cell Biol*. 2012 Feb 8;13(3):183-94. doi:10.1038/nrm3284.  
989
- 990 Nakagawa T, Setou M, Seog D, Ogasawara K, Dohmae N, Takio K, Hirokawa N. A  
991 novel motor, KIF13A, transports mannose-6-phosphate receptor to plasma membrane  
992 through direct interaction with AP-1 complex. *Cell*. 2000 Nov 10;103(4):569-81.  
993 doi:10.1016/S0092-8674(00)00161-6.  
994
- 995 Nakatsu F, Hase K, Ohno H. The Role of the Clathrin Adaptor AP-1: Polarized  
996 Sorting and Beyond. *Membranes (Basel)*. 2014 Nov 7;4(4):747-63. doi:  
997 10.3390/membranes4040747.  
998
- 999 Nakatsu F., Ohno H. Adaptor protein complexes as the key regulators of protein  
1000 sorting in the post-Golgi network. *Cell Struct. Funct*. 2003;28:419-429. doi:  
1001 10.1247/csf.28.419.  
1002
- 1003 Nayak, T., Szewczyk, E., Oakley, C.E., Osmani, A., Ukil, L., Murray, S.L., Hynes,  
1004 M.J., Osmani, S.A., Oakley, B.R. (2006). A versatile and efficient gene-targeting  
1005 system for *Aspergillus nidulans*. *Genetics*172: 1557-1566. doi:  
1006 10.1534/genetics.105.052563.  
1007

- 1008 Nayak T, Edgerton-Morgan H, Horio T, Xiong Y, De Souza CP, Osmani SA, Oakley  
1009 BR. Gamma-tubulin regulates the anaphase-promoting complex/cyclosome during  
1010 interphase. *J Cell Biol.* 2010 Aug 9;190(3):317-30. doi:10.1083/jcb.201002105.  
1011
- 1012 Nielsen E, Severin F, Backer JM, Hyman AA, Zerial M. Rab5 regulates motility of  
1013 early endosomes on microtubules. *Nat Cell Biol.* 1999 Oct;1(6):376-82. doi:  
1014 10.1038/14075.  
1015
- 1016 Pantazopoulou A, Pinar M, Xiang X, Peñalva MA. Maturation of late Golgi cisternae  
1017 into RabE(RAB11) exocytic post-Golgi carriers visualized in vivo. *Mol Biol Cell.*  
1018 2014 Aug 15;25(16):2428-43. doi:10.1091/mbc.E14-02-0710.  
1019
- 1020 Pantazopoulou A. The Golgi apparatus: insights from filamentous fungi. *Mycologia.*  
1021 2016 May-Jun;108(3):603-22. doi:10.3852/15-309  
1022
- 1023 Pantazopoulou A, Peñalva MA. Characterization of *Aspergillus nidulans* RabC/Rab6.  
1024 *Traffic.* 2011 Apr;12(4):386-406. doi: 10.1111/j.1600-0854.2011.01164.x.  
1025
- 1026 Pantazopoulou A, Peñalva MA. Organization and dynamics of the *Aspergillus*  
1027 *nidulans* Golgi during apical extension and mitosis. *Mol Biol Cell.* 2009  
1028 Oct;20(20):4335-47. doi:10.1091/mbc.E09-03-0254.  
1029
- 1030 Papadaki GF, Amillis S, Diallinas G. Substrate Specificity of the FurE Transporter Is  
1031 Determined by Cytoplasmic Terminal Domain Interactions. *Genetics.* 2017  
1032 Dec;207(4):1387-1400. doi:10.1534/genetics.117.300327  
1033
- 1034 Parmar HB, Duncan R. A novel tribasic Golgi export signal directs cargo protein  
1035 interaction with activated Rab11 and AP-1-dependent Golgi-plasma membrane  
1036 trafficking. *Mol Biol Cell.* 2016 Apr 15;27(8):1320-31. doi:10.1091/mbc.E15-12-  
1037 0845.  
1038
- 1039 Peñalva, M.A. (2005) Tracing the endocytic pathway of *Aspergillus nidulans* with  
1040 FM4-64. *Fungal Genet Biol.* 42: 963-975. doi:10.1016/j.fgb.2005.09.004.  
1041
- 1042 Peñalva MA, Zhang J, Xiang X, Pantazopoulou A. Transport of fungal RAB11  
1043 secretory vesicles involves myosin-5, dynein/dynactin/p25, and kinesin-1 and is  
1044 independent of kinesin-3. *Mol Biol Cell.* 2017 Apr 1;28(7):947-961. doi:  
1045 10.1091/mbc.E16-08-0566.  
1046
- 1047 Peñalva MA. A lipid-managing program maintains a stout Spitzenkörper. *Mol*  
1048 *Microbiol.* 2015 Jul;97(1):1-6. doi:10.1111/mmi.13044.  
1049
- 1050 Peñalva MÁ. Endocytosis in filamentous fungi: Cinderella gets her reward. *Curr Opin*  
1051 *Microbiol.* 2010 Dec;13(6):684-92. doi:10.1016/j.mib.2010.09.005.  
1052
- 1053 Phelan JP, Millson SH, Parker PJ, Piper PW, Cooke FT. Fab1p and AP-1 are required  
1054 for trafficking of endogenously ubiquitylated cargoes to the vacuole lumen in *S.*  
1055 *cerevisiae*. *J Cell Sci.* 2006 Oct 15;119(Pt 20):4225-34. doi:10.1242/jcs.03188  
1056



- 1057 Pinar M, Pantazopoulou A, Arst HN Jr, Peñalva MA. Acute inactivation of the  
1058 *Aspergillus nidulans* Golgi membrane fusion machinery: correlation of apical  
1059 extension arrest and tip swelling with cisternal disorganization. *Mol Microbiol.* 2013  
1060 Jul;89(2):228-48. doi:10.1111/mmi.12280.
- 1061
- 1062 Pinar M, Arst HN Jr, Pantazopoulou A, Tagua VG, de los Ríos V, Rodríguez-  
1063 Salarichs J, Díaz JF, Peñalva MA. TRAPP2 regulates exocytic Golgi exit by  
1064 mediating nucleotide exchange on the Ypt31 ortholog RabERAB11. *Proc Natl Acad  
1065 Sci U S A.* 2015 Apr 7;112(14):4346-51. doi:10.1073/pnas.1419168112.
- 1066
- 1067 Renard HF, Demaegd D, Guerriat B, Morsomme P. Efficient ER exit and vacuole  
1068 targeting of yeast Sna2p require two tyrosine-based sorting motifs. *Traffic.* 2010 Jul  
1069 1;11(7):931-46. doi:10.1111/j.1600-0854.2010.01070.x.
- 1070
- 1071 Robinson DG, Pimpl P. Clathrin and post-Golgi trafficking: a very complicated issue.  
1072 *Trends Plant Sci.* 2014 Mar;19(3):134-9. doi:10.1016/j.tplants.2013.10.008.
- 1073
- 1074 Robinson MS. Adaptable adaptors for coated vesicles. *Trends Cell Biol.* 2004  
1075 Apr;14(4):167-74. doi:10.1016/j.tcb.2004.02.002
- 1076
- 1077 Robinson MS. Forty Years of Clathrin-coated Vesicles. *Traffic.* 2015  
1078 Dec;16(12):1210-38. doi:10.1111/tra.12335.
- 1079
- 1080 Salogiannis J, Reck-Peterson SL. Hitchhiking: A Non-Canonical Mode of  
1081 Microtubule-Based Transport. *Trends Cell Biol.* 2017 Feb;27(2):141-150.  
1082 doi:10.1016/j.tcb.2016.09.005.
- 1083
- 1084 Schmidt MR, Maritzen T, Kukhtina V, Higman VA, Doglio L, Barak NN, Strauss H,  
1085 Oschkinat H, Dotti CG, Haucke V. Regulation of endosomal membrane traffic by a  
1086 Gadkin/AP-1/kinesin KIF5 complex. *Proc Natl Acad Sci U S A.* 2009 Sep  
1087 8;106(36):15344-9. doi:10.1073/pnas.0904268106.
- 1088
- 1089 Schultzhause Z, Shaw BD. Endocytosis and exocytosis in hyphal growth, *Fungal  
1090 Biology Reviews*, 2015, 29(2): 43-53. doi:10.1016/j.fbr.2015.04.002.
- 1091
- 1092 Schultzhause Z, Johnson TB, Shaw BD. Clathrin localization and dynamics in  
1093 *Aspergillus nidulans*. *Mol Microbiol.* 2017 Jan;103(2):299-318. doi:  
1094 10.1111/mmi.13557.
- 1095
- 1096 Schultzhause Z, Yan H, Shaw BD. *Aspergillus nidulans* flippase DnfA is cargo of the  
1097 endocytic collar and plays complementary roles in growth and phosphatidylserine  
1098 asymmetry with another flippase, DnfB. *Mol Microbiol.* 2015 Jul;97(1):18-32. doi:  
1099 10.1111/mmi.13019.
- 1100
- 1101 Schultzhause Z, Shaw BD. The flippase DnfB is cargo of fimbrin-associated  
1102 endocytosis in *Aspergillus nidulans*, and likely recycles through the late Golgi.  
1103 *Commun Integr Biol.* 2016 Mar 16;9(2):e1141843.  
1104 doi:10.1080/19420889.2016.1141843.
- 1105

- 1106 Shaw BD, Chung DW, Wang CL, Quintanilla LA, Upadhyay S. A role for endocytic  
1107 recycling in hyphal growth. *Fungal Biol.* 2011 Jun;115(6):541-6. doi:  
1108 10.1016/j.funbio.2011.02.010.  
1109
- 1110 Spang A. The Road not Taken: Less Traveled Roads from the TGN to the Plasma  
1111 Membrane. *Membranes (Basel)*. 2015 Mar 10;5(1):84-98. doi:  
1112 10.3390/membranes5010084.  
1113
- 1114 Spiliotis ET. Spatial effects - site-specific regulation of actin and microtubule  
1115 organization by septin GTPases. *J Cell Sci.* 2018 Jan 11;131(1). pii: jcs207555. doi:  
1116 10.1242/jcs.207555.  
1117
- 1118 Steinberg G, Peñalva MA, Riquelme M, Wösten HA, Harris SD. Cell Biology of  
1119 Hyphal Growth. *Microbiol Spectr.* 2017 Apr;5(2). doi:10.1128/microbiolspec.  
1120
- 1121 Steinberg G. Endocytosis and early endosome motility in filamentous fungi. *Curr*  
1122 *Opin Microbiol.* 2014 Aug;20:10-8. doi:10.1016/j.mib.2014.04.001.  
1123
- 1124 Steinberg G. 2007. Hyphal growth: a tale of motors, lipids, and the Spitzenkörper.  
1125 *Eukaryot Cell.* 6: 351-60. doi: 10.1128/EC.00381-06  
1126
- 1127 Taheri-Talesh N, Horio T, Araujo-Bazán L, Dou X, Espeso EA, Peñalva MA, Osmani  
1128 SA, Oakley BR. The tip growth apparatus of *Aspergillus nidulans*. *Mol Biol Cell.*  
1129 2008 Apr;19(4):1439-49. doi:10.1091/mbc.E07-05-0464.  
1130
- 1131 Takeshita N, Fischer R. On the role of microtubules, cell end markers, and septal  
1132 microtubule organizing centres on site selection for polar growth in *Aspergillus*  
1133 *nidulans*. *Fungal Biol.* 2011 Jun;115(6):506-17. doi:10.1016/j.funbio.2011.02.009.  
1134
- 1135 Takeshita N, Manck R, Grün N, de Vega SH, Fischer R. Interdependence of the actin  
1136 and the microtubule cytoskeleton during fungal growth. *Curr Opin Microbiol.* 2014  
1137 Aug;20:34-41. doi:10.1016/j.mib.2014.04.005.  
1138
- 1139 Takeshita N, Mania D, Herrero S, Ishitsuka Y, Nienhaus GU, Podolski M, Howard J,  
1140 Fischer R. The cell-end marker TeaA and the microtubule polymerase AlpA  
1141 contribute to microtubule guidance at the hyphal tip cortex of *Aspergillus nidulans*  
1142 to provide polarity maintenance. *J Cell Sci.* 2013 Dec 1;126(Pt 23):5400-11. doi:  
1143 10.1242/jcs.129841  
1144
- 1145 Takeshita N, Wernet V, Tsuizaki M, Grün N, Hoshi HO, Ohta A, Fischer R, Horiuchi  
1146 H. Transportation of *Aspergillus nidulans* Class III and V Chitin Synthases to the  
1147 Hyphal Tips Depends on Conventional Kinesin. *PLoS One.* 2015 May  
1148 8;10(5):e0125937. doi:10.1371/journal.pone.0125937.  
1149
- 1150 Takeshita N. Oscillatory fungal cell growth. *Fungal Genet Biol.* 2018 Jan;110:10-14.  
1151 doi:10.1016/j.fgb.2017.12.002.  
1152
- 1153 Valdivia RH, Baggott D, Chuang JS, Schekman RW. The yeast clathrin adaptor  
1154 protein complex 1 is required for the efficient retention of a subset of late Golgi

- 1155 membrane proteins. *Dev Cell*. 2002 Mar;2(3):283-94. doi:10.1016/S1534-  
1156 5807(02)00127-2.
- 1157
- 1158 Viotti C. ER to Golgi-Dependent Protein Secretion: The Conventional Pathway.  
1159 *Methods Mol Biol*. 2016;1459:3-29. doi:10.1007/978-1-4939-3804-9\_1.
- 1160
- 1161 Vlanti, A. & Diallinas, G. (2008). The *Aspergillus nidulans* FcyB cytosine-purine  
1162 scavenger is highly expressed during germination and in reproductive compartments  
1163 and is downregulated by endocytosis. *Mol Microbiol* 68: 959-977.  
1164 doi:10.1111/j.1365-2958.2008.06198.x
- 1165
- 1166 Welz T, Wellbourne-Wood J, Kerkhoff E. Orchestration of cell surface proteins by  
1167 Rab11. *Trends Cell Biol*. 2014 Jul;24(7):407-15. doi:10.1016/j.tcb.2014.02.004.
- 1168
- 1169 Whitfield ST, Burston HE, Bean BD, Raghuram N, Maldonado-Báez L, Davey M,  
1170 Wendland B, Conibear E. The alternate AP-1 adaptor subunit Apm2 interacts with the  
1171 Mill regulatory protein and confers differential cargo sorting. *Mol Biol Cell*. 2016  
1172 Feb 1;27(3):588-98. doi:10.1091/mbc.E15-09-0621
- 1173
- 1174 Yanai K, Kojima N, Takaya N, Horiuchi H, Ohta A, Takagi M. 1994. Isolation and  
1175 characterization of two chitin synthase genes from *Aspergillus nidulans*. *Biosci*  
1176 *Biotechnol Biochem*. 58:1828-1835. doi:10.1271/bbb.58.1828
- 1177
- 1178 Yeung BG, Payne GS. Clathrin interactions with C-terminal regions of the yeast AP-1  
1179 beta and gamma subunits are important for AP-1 association with clathrin coats.  
1180 *Traffic*. 2001 Aug;2(8):565-76. doi:10.1034/j.1600-0854.2001.20806.x.
- 1181
- 1182 Yu Y, Li C, Kita A, Katayama Y, Kubouchi K, Udo M, Imanaka Y, Ueda S,  
1183 Masuko T, Sugiura R. Sip1, an AP-1 accessory protein in fission yeast, is required for  
1184 localization of Rho3 GTPase. *PLoS One*. 2013 Jul 1;8(7):e68488. doi:  
1185 10.1371/journal.pone.0068488.
- 1186
- 1187 Zanetti G, Pahuja KB, Studer S, Shim S, Schekman R. COPII and the regulation of  
1188 protein sorting in mammals. *Nat Cell Biol*. 2011 Dec 22;14(1):20-8. doi:  
1189 10.1038/ncb2390.
- 1190
- 1191 Zekert N, Fischer R. The *Aspergillus nidulans* kinesin-3 UncA motor moves vesicles  
1192 along a subpopulation of microtubules. *Mol Biol Cell*. 2009 Jan;20(2):673-84. doi:  
1193 10.1091/mbc.E08-07-0685.
- 1194
- 1195 Zhang J, Yao X, Fischer L, Abenza JF, Peñalva MA, Xiang X. The p25 subunit of  
1196 the dynactin complex is required for dynein-early endosome interaction. *J Cell Biol*.  
1197 2011 Jun 27;193(7):1245-55. doi:10.1083/jcb.201011022.
- 1198
- 1199 Zhang Y, Gao T, Shao W, Zheng Z, Zhou M, Chen C. The septins FaCdc3 and  
1200 FaCdc12 are required for cytokinesis and affect asexual and sexual development, lipid  
1201 metabolism and virulence in *Fusarium asiaticum*. *Mol Plant Pathol*. 2017  
1202 Dec;18(9):1282-1294. doi:10.1111/mpp.12492.
- 1203

1204 Zhou L, Evangelinos M, Wernet V, Eckert AF, Ishitsuka Y, Fischer R, Nienhaus GU,  
1205 Takeshita N. Superresolution and pulse-chase imaging reveal the role of vesicle  
1206 transport in polar growth of fungal cells. *Sci Adv.* 2018 Jan 24;4(1):e1701798. doi:  
1207 10.1126/sciadv.1701798.

1208

1209

1210

1211

1212

1213 **Additional files**

1214 Figure 2 fig sup 1

1215 Figure 2 fig sup 2

1216 Figure 3 fig sup 1

1217 Figure 4 fig sup 1

1218 Supplementary Table 1

1219 Supplementary Table 2

1220 References to Supplementary Table 1

1221

1222

1223

1224

1225

1226

1227

1228

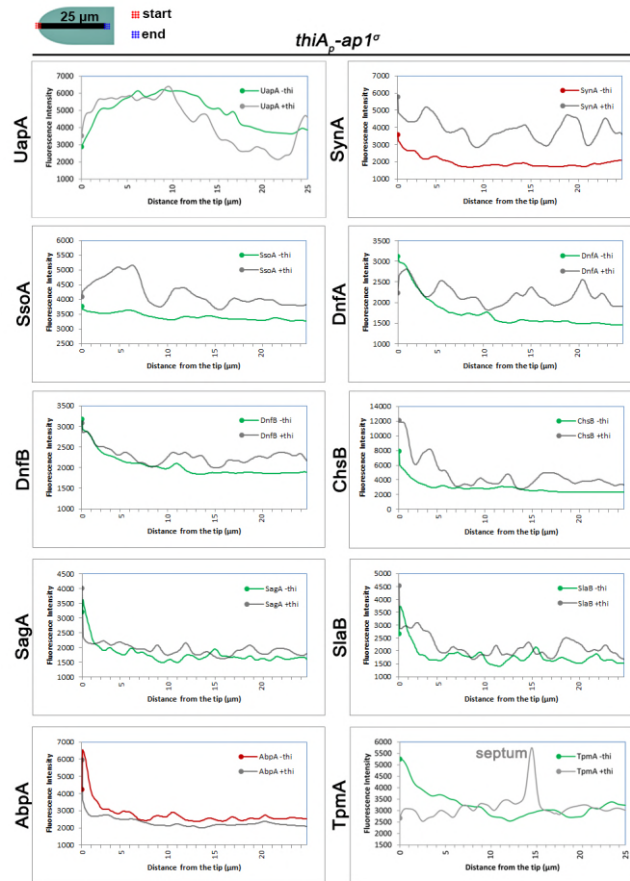

1229

1230 **Figure 2 Figure Supplement 1:** Quantitative analysis of fluorescence intensity of  
 1231 strains shown in Figure 2A, under  $ap1^{\sigma}$  expressed or fully repressed conditions (-thi,  
 1232 +thi respectively) along 25  $\mu\text{m}$  of hyphal tips. The region measured is depicted in the  
 1233 cartoon on the top left. For details of fluorescence intensity measurements see  
 1234 Materials and methods.

1235

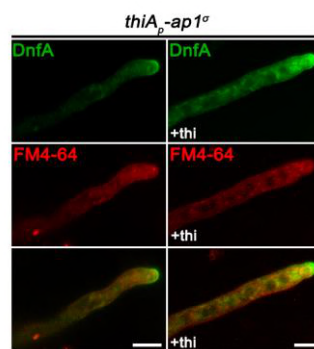

1236 **Figure 2 Figure Supplement 2.** Co-localization of DnfA-GFP with the endocytic dye  
1237 FM4-64 (10min) indicating that most immotile internal structures are not co-stained  
1238 with FM4-64.

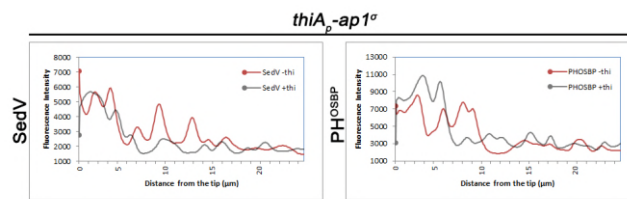

1239

1240 **Figure 3 Figure Supplement 1:** Quantitative analysis of fluorescence intensity of  
1241 strains shown in Figure 3E, under *ap1*<sup>σ</sup> expressed or fully repressed conditions (-thi,  
1242 +thi respectively) along 25 μm of hyphal tips. For details of fluorescence intensity  
1243 measurements see Materials and methods.

1244

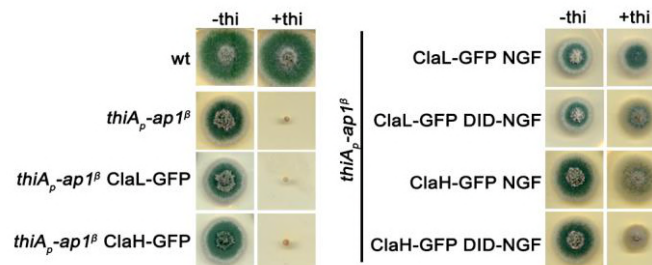

1245

1246 **Figure 4 Figure Supplement 1.** Left panel: Growth test of a standard wild-type (*wt*),  
1247 a strain carrying a thiamine-repressible *thi*<sub>p</sub>-*ap1*<sup>β</sup> allele, and strains expressing ClaL-  
1248 GFP and ClaH-GFP in the repressible *thi*<sub>p</sub>-*ap1*<sup>β</sup> background. Right panel: Growth test  
1249 of strains carrying the repressible *thi*<sub>p</sub>-*ap1*<sup>β</sup> allele “in locus”, together with wt or  
1250 mutated versions of Ap1<sup>β</sup> expressed from plasmid integration events, as well as,  
1251 ClaL-GFP and ClaH-GFP alleles. Notice that expression of the mutated Ap1<sup>β</sup>  
1252 versions, which seem defective for clathrin recruitment, partially rescue growth when  
1253 *thi*<sub>p</sub>-*ap1*<sup>β</sup> allele is repressed. This, together with results presented in Figure 4,  
1254 indicates that total lack of growth observed in the absence of AP-1 is not simply due  
1255 defective interaction of AP-1 with clathrin.

1256

1257

1258

1259

1260

1261



1262

1263 **Supplementary Table 1.** Strains used in this study. All strains carry the *veA1*  
 1264 mutation affecting sporulation. *pabaA1*, *pyroA4*, *riboB2*, *argB2*, *pyrG89*, *pantoB100*,  
 1265 *biA1*, *nicA2* and *inoB2* are auxotrophic mutations for p-aminobenzoic acid,  
 1266 pyridoxine, riboflavin, arginine, uracil/uridine, D-pantothenic acid, nicotinic acid,  
 1267 biotin and inositol respectively. *yA2* and *wA4* are mutations resulting in yellow and  
 1268 white conidiospore colors respectively.

| Name                                            | Genotype                                                                                                    | Reference |
|-------------------------------------------------|-------------------------------------------------------------------------------------------------------------|-----------|
| TNO2A7                                          | <i>nkuAΔ::argB pyrG89 pyroA4 riboB2</i>                                                                     | 8         |
| H1-mRFP                                         | <i>H1-mRFP::AFriboB nkuAΔ::argB pyrG89 pyroA4</i>                                                           | 9         |
| mRFP-PH <sup>OSBP</sup>                         | <i>pyroA4[pyroA::gpdA<sup>m</sup><sub>p</sub>::mRFP-PH<sup>OSBP</sup>] inoB2 niiA4 wA4</i>                  | 10        |
| mCherry-sedV                                    | <i>pyroA4[pyroA<sup>mut</sup>::gpdA<sup>m</sup><sub>p</sub>::mcherry-sedV] nkuAΔ::bar, wA4, niiA4 inoB2</i> | 11        |
| sagA-GFP                                        | <i>sagA<sup>(5xGA)</sup>GFP::AFpyrG nkuAΔ::argB pyroA4 riboB2 pyrG89</i>                                    | 4         |
| slaB-GFP                                        | <i>slaB-GFP::AFpyrG nkuAΔ::argB pyrG89 pyroA4 argB2</i>                                                     | 2         |
| mCherry-synA<br>GFP-tpmA                        | <i>mCherry-synA::AFpyrG yA::AFpyroA GFP-tpmA fwA1 pyrG89 pyroA4 nicA2 nkuAΔ::argB</i>                       | 16        |
| abpA-mRFP                                       | <i>abpA-mRFP::AFpyrG yA2 pabaA1 pyrG89</i>                                                                  | 2         |
| ssoA-GFP                                        | <i>GFP-ssoA::AFpyrG nkuAΔ::bar pyrG89 pyroA4</i>                                                            | 16        |
| rabOts                                          | <i>rab1<sup>A136D</sup>::AFpyrG pabaA1</i>                                                                  | 12        |
| sedVts                                          | <i>sedV<sup>R238G</sup>::AFpyrG pyroA4 pyrG89 nkuAΔ::bar</i>                                                | 12        |
| chsB-GFP                                        | <i>alcA<sub>p</sub>::GFP-chsB::NCpyr4 nkuAΔ::argB pyrG89 pyroA4</i>                                         | 17        |
| dnfA-GFP                                        | <i>dnfA-GFP::AFpyrG nkuAΔ::argB pyrG89 pabaA1 pyroA4</i>                                                    | 13        |
| dnfB-GFP                                        | <i>dnfB-GFP::AFpyrG nkuAΔ::argB pyrG89 pabaA1 pyroA4</i>                                                    | 13        |
| thiA <sub>p</sub> -ap1 <sup>σ</sup>             | <i>thiA<sub>p</sub>::FLAG ap1<sup>σ</sup>::AFriboB nkuAΔ::argB pyrG89 pyroA4 riboB2</i>                     | 7         |
| ap2 <sup>σ</sup> -mRFP                          | <i>ap2<sup>σ</sup>-(5xGA)mRFP::AFpyrG nkuAΔ::argB pyrG89 riboB2 pyroA4</i>                                  | 7         |
| thiA <sub>p</sub> -claL                         | <i>thiA<sub>p</sub>::claL::AFpyrG nkuAΔ::argB pyroA4 riboB2 pyrG89</i>                                      | 7         |
| thiA <sub>p</sub> -ap1 <sup>σ</sup><br>uapA-GFP | <i>thiA<sub>p</sub>::FLAG ap1<sup>σ</sup>::AFriboB alcA<sub>p</sub>-uapA-GFP pabaA1</i>                     | 7         |
| claL-GFP                                        | <i>claL<sup>(5xGA)</sup>GFP::AFpyrG nkuAΔ::argB pyroA4 riboB2 pyrG89</i>                                    | 7         |
| claH-GFP                                        | <i>claH<sup>(5xGA)</sup>GFP::AFpyrG nkuAΔ::argB pyroA4 riboB2 pyrG89</i>                                    | 7         |
| claL-mRFP                                       | <i>claL<sup>(5xGA)</sup>mRFP::AFpyrG nkuAΔ::argB pyroA4 riboB2 pyrG89</i>                                   | 7         |
| thiA <sub>p</sub> -claH<br>dnfA-GFP             | <i>thiA<sub>p</sub>-claH::AFpyroA dnfA-GFP::AFpyrG nkuAΔ::argB pyrG89 pabaA1 pyroA4</i>                     | 7         |
| ap2Δ dnfA-GFP                                   | <i>dnfA-GFP::AFpyrG ap2<sup>σ</sup>Δ::AFriboB nkuAΔ::argB pyrG89 pyroA4</i>                                 | 7         |
| mCherry-rabA                                    | <i>alcA<sub>p</sub>::mCherry-rabA::argB yA2 pantoB100 argB2</i>                                             | 1         |
| mRFP-rabB                                       | <i>alcA<sub>p</sub>::mRFP-rabB::pyroA niiA4 nkuAΔ::bar inoB2 pyroA4 wA3</i>                                 | 1         |
| aspB-GFP                                        | <i>aspB-GFP::AFpyrG pyrG89 argB2 pabaB22 nkuAΔ::argB riboB2</i>                                             | 19        |

|                                                              |                                                                                                                                                           |            |
|--------------------------------------------------------------|-----------------------------------------------------------------------------------------------------------------------------------------------------------|------------|
| aspC-GFP                                                     | <i>aspC-GFP::AFpyrG pabaA6 biA1</i>                                                                                                                       | 6          |
| aspD-GFP                                                     | <i>aspD-GFP::AFpyrG argB2 riboB2</i>                                                                                                                      | 3          |
| aspE-GFP                                                     | <i>aspE-GFP::AFpyrG riboB2</i>                                                                                                                            | 3          |
| mCherry-tubA                                                 | <i>alcA<sub>p</sub>::mCherry-tubA::pyroA nkuAΔ::argB pyrG89 pyroA4</i>                                                                                    | 17         |
| GFP-kinA <sup>rigor</sup>                                    | <i>kinAΔ::NCpyr4 alcA<sub>p</sub>::GFP-kinA<sup>rigor</sup>::pyroA pyrG89 pyroA4 argB2</i>                                                                | 14, 20     |
| claH-GFP                                                     | <i>claH<sup>-(5xGA)}</sup></i> GFP::AFpyrG <i>nkuAΔ::argB pyrG89 pyroA4 riboB2</i>                                                                        | This study |
| ap1 <sup>σ</sup> -GFP                                        | <i>ap1<sup>σ</sup>-(5xGA)}</i> GFP::AFpyrG <i>nkuAΔ::argB pyrG89 pyroA4 riboB2</i>                                                                        | This study |
| ap1 <sup>σ</sup> -mRFP                                       | <i>ap1<sup>σ</sup>-(5xGA)}</i> mRFP::AFpyrG <i>nkuAΔ::argB pyrG89 pyroA4 riboB2</i>                                                                       | This study |
| mRFP-rabB<br>ap1 <sup>σ</sup> -GFP                           | <i>alcA<sub>p</sub>::mRFP-rabB::pyroA4 ap1<sup>σ</sup>-(5xGA)}</i> GFP::AFpyrG <i>nkuAΔ::argB</i>                                                         | This study |
| thiA <sub>p</sub> -ap1 <sup>σ</sup><br>mCherry-rabA          | <i>thiA<sub>p</sub>::FLAG ap1<sup>σ</sup>::AFriboB alcA<sub>p</sub>::mCherry-rabA::argB nkuAΔ::argB pantoB100 pyroA4</i>                                  | This study |
| thiA <sub>p</sub> -ap1 <sup>σ</sup><br>mRFP-rabB             | <i>alcA<sub>p</sub>::mRFP-rabB::pyroA thiA<sub>p</sub>::FLAG ap1<sup>σ</sup>::AFriboB nkuAΔ::argB riboB2 pyroA4 wA3</i>                                   | This study |
| thiA <sub>p</sub> -ap1 <sup>σ</sup> GFP-<br>ssoA             | <i>thiA<sub>p</sub>::FLAG ap1<sup>σ</sup>::AFriboB GFP-ssoA::AFpyrG pabaA1</i>                                                                            | This study |
| thiA <sub>p</sub> -ap1 <sup>σ</sup><br>mCherry-sedV          | <i>thiA<sub>p</sub>::FLAG ap1<sup>σ</sup>::AFriboB pyroA4::[pyroA<sup>mut</sup>::gpdA<sup>m</sup><sub>p</sub>::mcherry-sedV] nkuAΔ::bar inoB2</i>         | This study |
| ap1 <sup>σ</sup> -GFP<br>mCherry-sedV                        | <i>ap1<sup>σ</sup>-(5xGA)}</i> GFP::AFpyrG <i>pyroA4[pyroA<sup>mut</sup>::gpdA<sup>m</sup><sub>p</sub>::mcherry-sedV] nkuAΔ::argB pyrG89 pyroA4 inoB2</i> | This study |
| thiA <sub>p</sub> -ap1 <sup>σ</sup><br>sagA-GFP              | <i>thiA<sub>p</sub>::FLAG ap1<sup>σ</sup>::AFriboB sagA<sup>-(5xGA)}</sup></i> GFP::AFpyrG <i>nkuAΔ::argB pyrG89 pyroA4 riboB2 (4)</i>                    | This study |
| thiA <sub>p</sub> -ap1 <sup>σ</sup> slaB-<br>GFP             | <i>thiA<sub>p</sub>::FLAG ap1<sup>σ</sup>::AFriboB slaB-GFP::AFpyrG nkuAΔ::argB pyrG89 pyroA4 riboB2</i>                                                  | This study |
| thiA <sub>p</sub> -ap1 <sup>σ</sup><br>abpA-mRFP             | <i>thiA<sub>p</sub>::FLAG ap1<sup>σ</sup>::AFriboB abpA-mRFP::AFpyrG nkuAΔ::argB pyrG89 pyroA4 riboB2</i>                                                 | This study |
| thiA <sub>p</sub> -ap1 <sup>σ</sup> H1-<br>mRFP              | <i>thiA<sub>p</sub>::FLAG ap1<sup>σ</sup>::AFriboB H1-mRFP::AFriboB</i>                                                                                   | This study |
| ap1 <sup>σ</sup> -GFP<br>thiA <sub>p</sub> -ap1 <sup>μ</sup> | <i>thiA<sub>p</sub>::ap1<sup>μ</sup>::AFriboB ap1<sup>σ</sup>-(5xGA)}</i> GFP::AFpyrG <i>nkuAΔ::argB pyrG89 pyroA4 riboB2</i>                             | This study |
| ap1 <sup>σ</sup> -GFP<br>thiA <sub>p</sub> -ap1 <sup>β</sup> | <i>thiA<sub>p</sub>::ap1<sup>β</sup>::AFriboB ap1<sup>σ</sup>-(5xGA)}</i> GFP::AFpyrG <i>nkuAΔ::argB pyrG89 pyroA4 riboB2</i>                             | This study |
| thiA <sub>p</sub> -ap1 <sup>σ</sup><br>mCherry-tubA          | <i>thiA<sub>p</sub>::FLAG ap1<sup>σ</sup>::AFriboB alcA<sub>p</sub>::mCherry-tubA:pyroA</i>                                                               | This study |
| kinA <sup>rigor</sup> -GFP<br>ap1 <sup>σ</sup> -mRFP         | <i>kinAΔ:pyr4 pyroA4[alcA<sub>p</sub>::kinA<sup>rigor</sup>-GFP:pyroA] ap1<sup>σ</sup>-(5xGA)}</i> mRFP::AFpyrG <i>pyrG89</i>                             | This study |
| ap1 <sup>σ</sup> -mRFP<br>claH-GFP                           | <i>ap1<sup>σ</sup>-(5xGA)}</i> mRFP::AFpyrG <i>claH<sup>-(5xGA)}</sup></i> GFP::AFpyrG <i>nkuAΔ::argB pyroA4</i>                                          | This study |
| ap1 <sup>σ</sup> -mRFP<br>dnfA-GFP                           | <i>dnfA-GFP::AFpyrG ap1<sup>σ</sup>-(5xGA)}</i> mRFP::AFpyrG <i>nkuAΔ::argB pyrG89 pyroA4</i>                                                             | This study |
| ap1 <sup>σ</sup> -GFP<br>mCherry-synA                        | <i>mCherry-synA::AFpyrG ap1<sup>σ</sup>-(5xGA)}</i> GFP::AFpyrG <i>nkuAΔ::argB pyrG89 pyroA4 nicA2</i>                                                    | This study |

|                                                                       |                                                                                                                                                 |            |
|-----------------------------------------------------------------------|-------------------------------------------------------------------------------------------------------------------------------------------------|------------|
| thiA <sub>p</sub> -ap1 <sup>σ</sup><br>dnfA-GFP<br>ap2 <sup>σ</sup> Δ | <i>thiA<sub>p</sub>::<sup>FLAG</sup> ap1<sup>σ</sup>::AFriboB ap2<sup>σ</sup>Δ::AFpyroA dnfA-GFP::AFpyrG nkuAΔ::argB pyroA4</i>                 | This study |
| thiA <sub>p</sub> -ap1 <sup>σ</sup><br>dnfB-GFP                       | <i>thiA<sub>p</sub>::<sup>FLAG</sup> ap1<sup>σ</sup>::AFriboB dnfB-GFP::AFpyrG nkuAΔ::argB pyrG89 pyroA4</i>                                    | This study |
| thiA <sub>p</sub> -ap1 <sup>σ</sup><br>claL-GFP                       | <i>thiA<sub>p</sub>::<sup>FLAG</sup> ap1<sup>σ</sup>::AFriboB claL<sup>(5xGA)</sup>-GFP::AFpyrG nkuAΔ::argB pyrG89 pyroA4 riboB2</i>            | This study |
| ap1 <sup>σ</sup> -GFP<br>mCherry-tubA                                 | <i>alcA<sub>p</sub>::mCherry-tubA::pyroA ap1<sup>σ</sup><sup>(5xGA)</sup>-GFP::AFpyrG nkuAΔ::argB pyrG89 pyroA4</i>                             | This study |
| thiA <sub>p</sub> -rabE                                               | <i>thiA<sub>p</sub>::rabE::AFriboB nkuAΔ::argB pyrG89 pyroA4 riboB2</i>                                                                         | This study |
| thiA <sub>p</sub> -rabE<br>ap1 <sup>σ</sup> -GFP                      | <i>ap1<sup>σ</sup><sup>(5xGA)</sup>-GFP::AFpyrG thiA<sub>p</sub>::rabE::AFriboB nkuAΔ::argB pyrG89 pyroA4 riboB2</i>                            | This study |
| ap1 <sup>σ</sup> -GFP<br>thiA <sub>p</sub> -claL                      | <i>ap1<sup>σ</sup><sup>(5xGA)</sup>-GFP::AFpyrG thiA<sub>p</sub>::claL::AFriboB nkuAΔ::argB pyrG89 pyroA4 riboB2</i>                            | This study |
| thiA <sub>p</sub> -ap1 <sup>σ</sup><br>aspB-GFP                       | <i>aspB-GFP::AFpyrG thiA<sub>p</sub>::<sup>FLAG</sup> ap1<sup>σ</sup>::AFriboB nkuAΔ::argB pyrG89 riboB2 pyroA4</i>                             | This study |
| thiA <sub>p</sub> -ap1 <sup>σ</sup><br>aspC-GFP                       | <i>aspC-GFP::AFpyrG thiA<sub>p</sub>::<sup>FLAG</sup> ap1<sup>σ</sup>::AFriboB pabaA6 pyroA4</i>                                                | This study |
| thiA <sub>p</sub> -ap1 <sup>σ</sup><br>aspD-GFP                       | <i>aspD-GFP::AFpyrG thiA<sub>p</sub>::<sup>FLAG</sup> ap1<sup>σ</sup>::AFriboB riboB2</i>                                                       | This study |
| thiA <sub>p</sub> -ap1 <sup>σ</sup><br>aspE-GFP                       | <i>aspE-GFP::AFpyrG thiA<sub>p</sub>::<sup>FLAG</sup> ap1<sup>σ</sup>::AFriboB pyroA4</i>                                                       | This study |
| thiA <sub>p</sub> -rabC                                               | <i>thiA<sub>p</sub>::rabC::AFriboB nkuAΔ::argB pyrG89 pyroA4 riboB2</i>                                                                         | This study |
| thiA <sub>p</sub> -rabC<br>ap1 <sup>σ</sup> -GFP                      | <i>thiA<sub>p</sub>::rabC::AFriboB ap1<sup>σ</sup><sup>(5xGA)</sup>-GFP::AFpyrG nkuAΔ::argB pyrG89 pyroA4 riboB2</i>                            | This study |
| GFP-rabE                                                              | <i>GFP-rabE::AFpyrG pyrG89 pyroA4 riboB2 nkuAΔ::argB</i>                                                                                        | This study |
| GFP-rabE ap1 <sup>σ</sup> -<br>mRFP                                   | <i>ap1<sup>σ</sup><sup>(5xGA)</sup>-mRFP::AFpyrG GFP-rabE::AFpyrG nkuAΔ::argB</i>                                                               | This study |
| thiA <sub>p</sub> -ap1 <sup>σ</sup><br>mCherry-synA<br>GFP-tpmA       | <i>thiA<sub>p</sub>::<sup>FLAG</sup> ap1<sup>σ</sup>::AFriboB yA::AFpyroA GFP-tpmA AFpyrG::mCherry-synA nkuAΔ::argB pyrG89</i>                  | This study |
| ap1 <sup>σ</sup> -GFP<br>mRFP-PH <sup>OSBP</sup>                      | <i>ap1<sup>σ</sup><sup>(5xGA)</sup>-GFP::AFpyrG [pyroA-gpdA<sup>m</sup><sub>p</sub>::mRFP-PH<sup>OSBP</sup>]pyroA4 nkuAΔ::argB pyrG89 inoB2</i> | This study |
| thiA <sub>p</sub> -ap1 <sup>σ</sup><br>mRFP-PH <sup>OSBP</sup>        | <i>pyroA4[pyroA-gpdA<sup>m</sup><sub>p</sub>::mRFP-PH<sup>OSBP</sup>] thiA<sub>p</sub>::<sup>FLAG</sup> ap1<sup>σ</sup>::AFriboB</i>            | This study |
| thiA <sub>p</sub> -ap1 <sup>σ</sup> ap2 <sup>σ</sup> Δ<br>dnfA-GFP    | <i>thiA<sub>p</sub>::<sup>FLAG</sup> ap1<sup>σ</sup>::AFriboB ap2<sup>σ</sup>Δ::AFpyroA dnfA-GFP::AFpyrG nkuAΔ::argB pyroA4</i>                 | This study |
| rabO <sup>ts</sup> ap1 <sup>σ</sup> -GFP                              | <i>rab1<sup>A136D</sup>::AFpyrG ap1<sup>σ</sup><sup>(5xGA)</sup>-GFP::AFpyrG pyroA4</i>                                                         | This study |
| sedV <sup>ts</sup> ap1 <sup>σ</sup> -GFP                              | <i>sedV<sup>R238G</sup>::AFpyrG ap1<sup>σ</sup><sup>(5xGA)</sup>-GFP::AFpyrG nkuAΔ::bar pyroA4</i>                                              | This study |
| thiA <sub>p</sub> -ap1 <sup>σ</sup> GFP-<br>rabE mCherry-<br>synA     | <i>thiA<sub>p</sub>::<sup>FLAG</sup> ap1<sup>σ</sup>::AFriboB GFP-rabE::AFpyrG AFpyrG::mCherry-synA nkuAΔ::argB pyrG89 pyroA4</i>               | This study |
| ap1 <sup>σ</sup> -GFP<br>uncAΔ                                        | <i>ap1<sup>σ</sup><sup>(5xGA)</sup>-GFP::AFpyrG uncAΔ::AFriboB nkuAΔ::argB pyrG89 riboB2 pyroA4</i>                                             | This study |

|                                                                           |                                                                                                                                                   |            |
|---------------------------------------------------------------------------|---------------------------------------------------------------------------------------------------------------------------------------------------|------------|
| thiA <sub>p</sub> -rabE claL-GFP                                          | <i>thiA<sub>p</sub>-rabE::AFriboB claL<sup>-(5xGA)</sup>GFP::AFpyrG nkuAΔ::argB pyrG89 riboB2 pyroA4</i>                                          | This study |
| thiA <sub>p</sub> -rabE claH-GFP                                          | <i>thiA<sub>p</sub>-rabE::AFriboB claH<sup>-(5xGA)</sup>GFP::AFpyrG nkuAΔ::argB pyrG89 riboB2 pyroA4</i>                                          | This study |
| thiA <sub>p</sub> -claL GFP-rabE                                          | <i>thiA<sub>p</sub>-claL::AFriboB GFP-rabE::AFpyrG nkuAΔ::argB pyrG89 pyroA4 riboB2</i>                                                           | This study |
| thiA <sub>p</sub> -rabE mCherry-synA                                      | <i>thiA<sub>p</sub>-rabE::AFriboB AFpyrG::mcherry-synA nkuAΔ::argB pyrG89 pyroA4</i>                                                              | This study |
| thiA <sub>p</sub> -rabE GFP-chsB                                          | <i>thiA<sub>p</sub>-rabE::AFriboB AFpyrG::alcA<sub>p</sub>-GFP-chsB nkuAΔ::argB pyrG89 pyroA4 riboB2</i>                                          | This study |
| thiA <sub>p</sub> -ap1 <sup>β</sup> claH-GFP                              | <i>thiA<sub>p</sub>-ap1<sup>β</sup>::AFpyrG claH<sup>-(5xGA)</sup>GFP::AFpyrG argB2</i>                                                           | This study |
| thiA <sub>p</sub> -ap1 <sup>β</sup> claL-GFP                              | <i>thiA<sub>p</sub>-ap1<sup>β</sup>::AFpyrG claL<sup>-(5xGA)</sup>GFP::AFpyrG argB2</i>                                                           | This study |
| thiA <sub>p</sub> -ap1 <sup>β</sup> claH-GFP ap1 <sup>β</sup>             | <i>thiA<sub>p</sub>-ap1<sup>β</sup>::AFpyrG claH<sup>-(5xGA)</sup>GFP::AFpyrG ap1<sup>β</sup>::argB argB2</i>                                     | This study |
| thiA <sub>p</sub> -ap1 <sup>β</sup> claL-GFP ap1 <sup>β</sup>             | <i>thiA<sub>p</sub>-ap1<sup>β</sup>::AFpyrG claL<sup>-(5xGA)</sup>GFP::AFpyrG ap1<sup>β</sup>::argB argB2</i>                                     | This study |
| thiA <sub>p</sub> -ap1 <sup>β</sup> claH-GFP ap1 <sup>β</sup> NGF/A       | <i>thiA<sub>p</sub>-ap1<sup>β</sup>::AFpyrG claH<sup>-(5xGA)</sup>GFP::AFpyrG ap1<sup>β</sup>-N709A/G710A/F711A::argB argB2</i>                   | This study |
| thiA <sub>p</sub> -ap1 <sup>β</sup> claH-GFP ap1 <sup>β</sup> DID/A NGF/A | <i>thiA<sub>p</sub>-ap1<sup>β</sup>::AFpyrG claH<sup>-(5xGA)</sup>GFP::AFpyrG ap1<sup>β</sup>-D632A/I633A/D634AN709A/G710A/ F711A argB2</i>       | This study |
| thiA <sub>p</sub> -ap1 <sup>β</sup> claL-GFP ap1 <sup>β</sup> NGF/A       | <i>thiA<sub>p</sub>-ap1<sup>β</sup>::AFpyrG claL<sup>-(5xGA)</sup>GFP::AFpyrG ap1<sup>β</sup>-N709A/G710A/F711A::argB argB2</i>                   | This study |
| thiA <sub>p</sub> -ap1 <sup>β</sup> claL-GFP ap1 <sup>β</sup> DID/A NGF/A | <i>thiA<sub>p</sub>-ap1<sup>β</sup>::AFpyrG claL<sup>-(5xGA)</sup>GFP::AFpyrG ap1<sup>β</sup>-D632A/I633A/D634AN709A/G710A/ F711A::argB argB2</i> | This study |

1269

1270

1271

1272

1273

1274

1275

1276

1277

1278

1279

1280

1281

1282 **Supplementary Table 2.** Oligonucleotides used in this study for cloning purposes

| Oligonucleotides                                                                               | Sequence                                 |
|------------------------------------------------------------------------------------------------|------------------------------------------|
| <b><i>pGEM apI<sup>σ</sup>-(5xGA)GFP::AFpyrG / pGEM apI<sup>σ</sup>-(5xGA)mRFP::AFpyrG</i></b> |                                          |
| apI <sup>σ</sup> 5' ApaI F                                                                     | CGCGGGGCCCCATTTCTAGGGATGTGGCTGCAGG       |
| apI <sup>σ</sup> 3' ORF XbaI NS R                                                              | CGCGTCTAGACATGATCTTCGTAACCACATCTTCCTC    |
| apI <sup>σ</sup> 3' XbaI F                                                                     | CGCGTCTAGAGAGCGTCATCAGTGATACGCTTC        |
| apI <sup>σ</sup> 3' NotI R                                                                     | CGCGGCGGCGCGGGCGTGAGGATACCATCATCGAATG    |
| 5xGA XbaI F                                                                                    | CGCGTCTAGAGGAGCTGGTGCAGGCGCTGGAGCCGGTGCC |
| AFpyrG XbaI R                                                                                  | CGCGTCTAGAACTGTCTGAGAGGAGGCACTGATGCG     |
| <b><i>pBS SKII claH-(5xGA)GFP::AFpyrG</i></b>                                                  |                                          |
| claH ORF KpnI F                                                                                | CGCGGGTACCCTGGACCAGCTCGCAGAACTTGAAG      |
| claH ORF NS SpeI R                                                                             | CGCGACTAGTGAAAGGACGGAACCCCGTGGCCTG       |
| claH 3' SpeI F                                                                                 | CGCGACTAGTGCTCGCCTTGTCTTTTTGAGGGGTAG     |
| claH 3' NotI R                                                                                 | CGCGGCGGCGCGGACAATCAGATTGACAGGGAGGG      |
| 5xGA SpeI F                                                                                    | CGCGACTAGTGGAGCTGGTGCAGGCGCTGGAGCCGGTGCC |
| AFpyrG SpeI R                                                                                  | CGCGACTAGTACTGTCTGAGAGGAGGCACTGATGCG     |
| <b><i>pGEM thiA<sub>p</sub>::apI<sup>μ</sup>::AFriboB</i></b>                                  |                                          |
| apI <sup>μ</sup> 5' ApaI F                                                                     | CGCGGGGCCCCGATACGAGCGTTCAGGACCGCTTC      |
| apI <sup>μ</sup> 5' SpeI R                                                                     | CGCGACTAGTGCACTTGCCACAACCTCCAGTATTC      |
| apI <sup>μ</sup> ORF SpeI F                                                                    | CGCGACTAGTATGGCATCGGCGGTTTTCTTCTAG       |
| apI <sup>μ</sup> ORF NotI R                                                                    | CGCGGCGGCGCCAGTTCTGCGCGCATAAGAAACTC      |
| AFriboB SpeI R                                                                                 | CCGGACTAGTCCCCGGGCTGCAGGAATTCGATAAG      |
| thiA <sub>p</sub> SpeI R                                                                       | CGCGACTAGTGTTGACTCAGTTCAATGGTTTCGAC      |
| <b><i>pGEM thiA<sub>p</sub>::apI<sup>β</sup>::AFriboB</i></b>                                  |                                          |
| apI <sup>β</sup> 5' ApaI F                                                                     | CGCGGGGCCCCAAGGCCGATTCTGAACCGAGC         |
| apI <sup>β</sup> 5' SpeI R                                                                     | CGCGACTAGTGCCCTACTAGCTCTTCAGTCATAC       |
| apI <sup>β</sup> ORF SpeI F                                                                    | CGCGACTAGTATGGATTGTTGTGGACAGGGGAAG       |
| apI <sup>β</sup> ORF NotI R                                                                    | CGCGGCGGCGCCACCAGAGAACAACCTCGGAATACC     |
| AFriboB SpeI R                                                                                 | CCGGACTAGTCCCCGGGCTGCAGGAATTCGATAAG      |
| thiA <sub>p</sub> SpeI R                                                                       | CGCGACTAGTGTTGACTCAGTTCAATGGTTTCGAC      |
| <b><i>pGEM thiA<sub>p</sub>::rabE::AFriboB</i></b>                                             |                                          |
| rabE 5' ApaI F                                                                                 | CGCGGGGCCCCGAGTGCGGAATATGCCTCCACCTG      |
| rabE 5' SpeI R                                                                                 | CGCGACTAGTAGCGAACAGTTAGATACACCGAGGG      |
| rabE ORF SpeI F                                                                                | CGCGACTAGTATGGCTAACGACGAGTATGATGTGAG     |
| rabE 3' NotI R                                                                                 | CGCGGCGGCGCGCTAACGGCTGAGCTAGGTTACTG      |
| AFriboB SpeI R                                                                                 | CCGGACTAGTCCCCGGGCTGCAGGAATTCGATAAG      |
| thiA <sub>p</sub> SpeI R                                                                       | CGCGACTAGTGTTGACTCAGTTCAATGGTTTCGAC      |
| <b><i>pGEM thiA<sub>p</sub>::rabC::AFriboB</i></b>                                             |                                          |
| rabC 5' ApaI F                                                                                 | CGCGGGGCCCCAACGGTTATGGACGAAGTATGCGG      |
| rabC 5' XbaI R                                                                                 | CGCGTCTAGAGGGGACAAGAGGTCAAATGTAAAGTC     |
| rabC ORF XbaI F                                                                                | CGCGTCTAGAATGGCTTCAGCATCAACGGCCGGG       |
| rabC 3' NotI R                                                                                 | CGCGGCGGCGCGGGTAGTTGAGCTCAACGCATCG       |
| AFriboB XbaI R                                                                                 | CCGGTCTAGACCCGGGCTGCAGGAATTCGATAAG       |
| thiA <sub>p</sub> XbaI R                                                                       | CGCGTCTAGAGTTGACTCAGTTCAATGGTTTCGAC      |
| <b><i>pGEM uncA::AFriboB</i></b>                                                               |                                          |
| uncA 5' ApaI F                                                                                 | CGCGGGGCCCCCGGCATAAGCTCTTCTGCTATG        |
| uncA 5' SpeI R                                                                                 | CGCGACTAGTGGAGCGGACAACAAATTGCGCACG       |
| uncA 3' SpeI F                                                                                 | CGCGACTAGTTCGCGGATGAAGATCTACTGGAATG      |
| uncA 3' NotI R                                                                                 | CGCGGCGGCGCCCTGGTGCTGAAGTCGTCTGTCTGTC    |
| AFriboB SpeI F                                                                                 | CCGGACTAGTAAGCTTGATATCACAATCAGCTTTTC     |
| AFriboB SpeI R                                                                                 | CCGGACTAGTCCCCGGGCTGCAGGAATTCGATAAG      |
| <b><i>pGEM GFP-rabE::AFpyrG</i></b>                                                            |                                          |
| rabE 5' ApaI F                                                                                 | CGCGGGGCCCCGAGTGCGGAATATGCCTCCACCTG      |
| rabE 5' SpeI R                                                                                 | CGCGACTAGTAGCGAACAGTTAGATACACCGAGGG      |
| rabE ORF SpeI F                                                                                | CGCGACTAGTATGGCTAACGACGAGTATGATGTGAG     |
| rabE ORF SpeI R                                                                                | CGCGACTAGTTTAAACAGCATCCACCCTTGTCTCGG     |
| rabE 3' SpeI F                                                                                 | CGCGACTAGTCGTCAACAACGATTTGCGGTTCTG       |
| rabE 3' NotI R2                                                                                | CGCGGCGGCGCCCTGTCCAGACCAAAGACCTCCGG      |
| sGFP XbaI F                                                                                    | CGCGTCTAGAATGGTGAGCAAGGGCGAGGAG          |
| sGFP SpeI NS R                                                                                 | CGCGACTAGTCTTGTACAGCTCGTCCATGCC          |
| AFpyrG SpeI F                                                                                  | CGCGACTAGTGCCCAAACAATGCTCTTACCCTC        |



|                                                               |                                                    |
|---------------------------------------------------------------|----------------------------------------------------|
| AFpyrG XbaI R                                                 | CGCGTCTAGAACTGTCTGAGAGGAGGCACTGATGCG               |
| <b>pBS SKII <i>ap1<sup>β</sup>-argB</i></b>                   |                                                    |
| <i>ap1<sup>β</sup></i> 5' BamHI F                             | CGCGGGATCCCCATACGATACACCCAAGGCGAAG                 |
| <i>ap1<sup>β</sup></i> 3' NotI R                              | CGCGGCGGCCGCCATTGGCGGCTTCAGACACCAC                 |
| <i>argB</i> PstI F                                            | CGCGCTGCAGGCTTATTTTCGCGGTTTTTTGGGG                 |
| <i>argB</i> PstI R                                            | CGCGCTGCAGGTCGACCTACAGCCATTGCG                     |
| <b>Mutagenesis oligos</b>                                     |                                                    |
| <i>ap1<sup>β</sup></i> <sup>632</sup> DID <sup>634</sup> /A F | CAATGTGGAGAACCTTCTGGCGGCCGCTTTTCGATGGCACTGCGCCTGC  |
| <i>ap1<sup>β</sup></i> <sup>632</sup> DID <sup>634</sup> /A R | GCAGGCGCAGTGCCATCGAAAGCGGCCGCCAGAAGGTTCTCCACATTG   |
| <i>ap1<sup>β</sup></i> <sup>709</sup> NGF <sup>711</sup> /A F | GTGCGGGCGCTGACCTTCTCGCGGCCGCTTCTGGGTTGGATCTTTCCGGC |
| <i>ap1<sup>β</sup></i> <sup>709</sup> NGF <sup>711</sup> /A R | GCCGAAAGATCCAACCCAGAAGCGGCCGCGAGAAGGTCAGCGCCCCGCAC |

---

1283 *ap1<sup>σ<sub>-</sub>(5xGA)</sup>*GFP::AFpyrG, *clpH<sup>-</sup>(5xGA)*GFP::AFpyrG and *ap1<sup>σ<sub>-</sub>(5xGA)</sup>*mRFP::AFpyrG

1284 constructs carry a 5 x Gly-Ala (5xGA) linker, amplified together with GFP or mRFP

1285 and AFpyrG from plasmids p1439, or p1491 respectively (Szewczyk *et al.*, 2006).

1286

## 1287 Supplementary References

- 1288 1. Abenza JF, Galindo A, Pantazopoulou A, Gil C, de los Ríos V, Peñalva MA.
- 1289 (2010). Aspergillus RabB Rab5 integrates acquisition of degradative identity
- 1290 with the long distance movement of early endosomes. Mol Biol Cell. 21:
- 1291 2756-2769.
- 1292 2. Araujo-Bazán L, Peñalva MA, Espeso EA. (2008). Preferential localization of
- 1293 the endocytic internalization machinery to hyphal tips underlies polarization of
- 1294 the actin cytoskeleton in Aspergillus nidulans. Mol Microbiol. 67: 891-905.
- 1295 3. Hernández-Rodríguez Y, Masuo S, Johnson D, Orlando R, Smith A, Couto-
- 1296 Rodríguez M, Momany M. (2014). Distinct septin heteropolymers co-exist
- 1297 during multicellular development in the filamentous fungus Aspergillus
- 1298 nidulans. PLoS One. 9: e92819.
- 1299 4. Karachaliou M, Amillis S, Evangelinos M, Kokotos AC, Yalellis V, Diallinas
- 1300 G. (2013). The arrestin-like protein ArtA is essential for ubiquitination and
- 1301 endocytosis of the UapA transporter in response to both broad-range and
- 1302 specific signals. Mol Microbiol. 88: 301-317.
- 1303 5. Konzack S, Rischitor PE, Enke C, Fischer R. (2005). The role of the kinesin
- 1304 motor KipA in microtubule organization and polarized growth of Aspergillus
- 1305 nidulans. Mol Biol Cell. 16: 497-506.
- 1306 6. Lindsey R, Cowden S, Hernández-Rodríguez Y, Momany M. (2010). Septins
- 1307 AspA and AspC are important for normal development and limit the
- 1308 emergence of new growth foci in the multicellular fungus Aspergillus
- 1309 nidulans. Eukaryot Cell. 9: 155-163.
- 1310 7. Martzoukou O, Amillis S, Zervakou A, Christoforidis S, Diallinas G. (2017).
- 1311 The AP-2 complex has a specialized clathrin-independent role in apical
- 1312 endocytosis and polar growth in fungi. Elife. 6: e20083.
- 1313 8. Nayak T, Szewczyk E, Oakley CE, Osmani A, Ukil L, Murray SL, Hynes MJ,
- 1314 Osmani SA, Oakley BR. (2006). A versatile and efficient gene-targeting
- 1315 system for *Aspergillus nidulans*. Genetics 172: 1557-1566.

- 1316 9. Nayak T, Edgerton-Morgan H, Horio T, Xiong Y, De Souza CP, Osmani SA,  
1317 Oakley BR. 2010. Gamma-tubulin regulates the anaphase-promoting  
1318 complex/cyclosome during interphase. *J Cell Biol.* 190: 317-330.
- 1319 10. Pantazopoulou A, Peñalva MA. (2009). Organization and dynamics of the  
1320 *Aspergillus nidulans* Golgi during apical extension and mitosis. *Mol Biol Cell.*  
1321 20: 4335-4347.
- 1322 11. Pantazopoulou A, Peñalva MA. (2011). Characterization of *Aspergillus*  
1323 *nidulans* RabC/Rab6. *Traffic.* 12: 386-406.
- 1324 12. Pinar M, Pantazopoulou A, Arst HN Jr, Peñalva MA. (2013). Acute  
1325 inactivation of the *Aspergillus nidulans* Golgi membrane fusion machinery:  
1326 correlation of apical extension arrest and tip swelling with cisternal  
1327 disorganization. *Mol Microbiol.* 89: 228-248.
- 1328 13. Schultzhaus Z, Yan H, Shaw BD. (2015). *Aspergillus nidulans* flippase DnfA  
1329 is cargo of the endocytic collar and plays complementary roles in growth and  
1330 phosphatidylserine asymmetry with another flippase, DnfB. *Mol Microbiol.*  
1331 97:18-32.
- 1332 14. Seidel C, Zekert N, Fischer R. (2012). The *Aspergillus nidulans* kinesin-3 tail  
1333 is necessary and sufficient to recognize modified microtubules. *PLoS One.* 7:  
1334 e30976.
- 1335 15. Szewczyk, E., Nayak, T., Oakley, C.E., Edgerton, H., Xiong, Y., Taheri-  
1336 Talesh, N., Osmani, S.A., Oakley, B.R. (2006). Fusion PCR and gene  
1337 targeting in *Aspergillus nidulans*. *Nat Protoc* 1: 3111-3120.
- 1338 16. Taheri-Talesh N, Horio T, Araujo-Bazán L, Dou X, Espeso EA, Peñalva MA,  
1339 Osmani SA, Oakley BR. (2008). The tip growth apparatus of *Aspergillus*  
1340 *nidulans*. *Mol Biol Cell.* 19:1439-49
- 1341 17. Takeshita N, Mania D, Herrero de Vega S, Ishitsuka Y, Nienhaus GU,  
1342 Podolski M, Howard J, Fischer R. (2013). The cell end marker TeaA and the  
1343 microtubule polymerase AlpA contribute to microtubule guidance at the  
1344 hyphal tip cortex of *Aspergillus nidulans* for polarity maintenance. *J Cell Sci*  
1345 126: 5400-5411.
- 1346 18. Takeshita N, Wernet V, Tsuzaki M, Grün N, Hoshi HO, Ohta A, Fischer R,  
1347 Horiuchi H. (2015). Transportation of *Aspergillus nidulans* Class III and V  
1348 Chitin Synthases to the Hyphal Tips Depends on Conventional Kinesin. *PLoS*  
1349 *One.* 10:e0125937.
- 1350 19. Westfall PJ, Momany M. (2002). *Aspergillus nidulans* septin AspB plays pre-  
1351 and postmitotic roles in septum, branch, and conidiophore development. *Mol*  
1352 *Biol Cell.* 13:110-8.
- 1353 20. Zekert N, Fischer R. (2009). The *Aspergillus nidulans* kinesin-3 UncA motor  
1354 moves vesicles along a subpopulation of microtubules. *Mol Biol Cell.* 20:673-  
1355 84.

1356
